# Supplementary material for: A population-based case–control study on social factors and risk of testicular germ cell tumours
Source: PubMed Central journal article supplement — BMJ Open. 2013 Sep 20;3(9):e003833. doi: 10.1136/bmjopen-2013-003833 (PMC3780297; doi:10.1136/bmjopen-2013-003833), 2013-09-20
Supplement: bmjopen-2013-003833.draft_revisions.pdf [file bmjopen-2013-003833.draft_revisions.pdf]

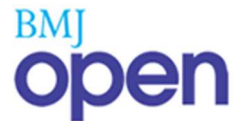

**A population-based case-control study on social factors and risk of testicular cancer**

|                                  |                                                                                                                                                                                                                                                                                                                                                                                                                                                                                                                                                                                                                                                                                                                                                                                                                                                                                                                                                                                                                                                                        |
|----------------------------------|------------------------------------------------------------------------------------------------------------------------------------------------------------------------------------------------------------------------------------------------------------------------------------------------------------------------------------------------------------------------------------------------------------------------------------------------------------------------------------------------------------------------------------------------------------------------------------------------------------------------------------------------------------------------------------------------------------------------------------------------------------------------------------------------------------------------------------------------------------------------------------------------------------------------------------------------------------------------------------------------------------------------------------------------------------------------|
| Journal:                         | <i>BMJ Open</i>                                                                                                                                                                                                                                                                                                                                                                                                                                                                                                                                                                                                                                                                                                                                                                                                                                                                                                                                                                                                                                                        |
| Manuscript ID:                   | bmjopen-2011-000536                                                                                                                                                                                                                                                                                                                                                                                                                                                                                                                                                                                                                                                                                                                                                                                                                                                                                                                                                                                                                                                    |
| Article Type:                    | Research                                                                                                                                                                                                                                                                                                                                                                                                                                                                                                                                                                                                                                                                                                                                                                                                                                                                                                                                                                                                                                                               |
| Date Submitted by the Author:    | 18-Feb-2013                                                                                                                                                                                                                                                                                                                                                                                                                                                                                                                                                                                                                                                                                                                                                                                                                                                                                                                                                                                                                                                            |
| Complete List of Authors:        | Schmeisser, Nils; State Statistical Institute Bremen, ; University of Bremen,<br>Conway, David; University of Glasgow, College of Medical, Veterinary and Life Sciences,<br>Stang, Andreas; Martin-Luther-University of Halle-Wittenberg, Medical Faculty, Institute of Medical Epidemiology, Biometry and Informatics, Clinical Epidemiology Unit<br>Jahn, Ingeborg; Leibniz-Institute for Prevention Research and Epidemiology - BIPS, Department of Prevention and Evaluation<br>Stegmaier, Christa; Saarland Cancer Registry,<br>Baumgardt-Elms, Cornelia; Authority of Science and Health, Authority for Social Affairs, Family, Health and Consumer Protection,<br>Joeckel, Karl-Heinz; University of Duisburg-Essen, Institute for Medical Informatics, Biometry and Epidemiology,<br>Behrens, Thomas; Leibniz-Institute for Prevention Research and Epidemiology - BIPS, Epidemiological Methods and Etiologic Research<br>Ahrens, Wolfgang; Leibniz-Institute for Prevention Research and Epidemiology - BIPS, Epidemiological Methods and Etiologic Research |
| <b>Primary Subject Heading</b> : | Occupational and environmental medicine                                                                                                                                                                                                                                                                                                                                                                                                                                                                                                                                                                                                                                                                                                                                                                                                                                                                                                                                                                                                                                |
| Secondary Subject Heading:       | Oncology, Occupational and environmental medicine                                                                                                                                                                                                                                                                                                                                                                                                                                                                                                                                                                                                                                                                                                                                                                                                                                                                                                                                                                                                                      |
| Keywords:                        | germ cell cancer, socioeconomic status, case-control study, occupational risk factors                                                                                                                                                                                                                                                                                                                                                                                                                                                                                                                                                                                                                                                                                                                                                                                                                                                                                                                                                                                  |
|                                  |                                                                                                                                                                                                                                                                                                                                                                                                                                                                                                                                                                                                                                                                                                                                                                                                                                                                                                                                                                                                                                                                        |

SCHOLARONE™  
Manuscripts

## A Population-based Case-Control Study on Social Factors and Risk of Testicular Cancer

**Running head:** Social Factors and Testicular Cancer

Authors and affiliation:

Nils Schmeisser<sup>1, 2</sup>

David I. Conway<sup>3</sup>

Andreas Stang<sup>4</sup>

Ingeborg Jahn<sup>5</sup>

Christa Stegmaier<sup>6</sup>

Cornelia Baumgardt-Elms<sup>7</sup>

Karl-Heinz Jöckel<sup>8</sup>

Thomas Behrens<sup>9</sup>

Wolfgang Ahrens<sup>2, 9</sup>

1. State Statistical Institute Bremen; Bremen, Germany

2. University of Bremen, Bremen, Germany

3. University of Glasgow, College of Medical, Veterinary and Life Sciences; Glasgow, UK

4. Martin-Luther-University of Halle-Wittenberg, Medical Faculty, Institute of Medical Epidemiology, Biometry and Informatics, Clinical Epidemiology Unit; Halle, Germany

5. Leibniz-Institute for Prevention Research and Epidemiology - BIPS, Department of Prevention and Evaluation; Bremen, Germany

6. Saarland Cancer Registry; Saarbrücken, Germany

7. Authority of Science and Health, Authority for Social Affairs, Family, Health and Consumer Protection; Hamburg, Germany

8. University of Duisburg-Essen, Institute for Medical Informatics, Biometry and Epidemiology; Essen, Germany

9. Leibniz-Institute for Prevention Research and Epidemiology - BIPS, Department of Epidemiological Methods and Etiologic Research; Bremen, Germany

Address for correspondence:

Prof. Dr. Wolfgang Ahrens

Leibniz-Institute for Prevention Research and Epidemiology - BIPS

Achterstrasse 30

28359 Bremen, Germany

Phone: +49 421 218 56822

Fax: +49 421 218 56821

Email: ahrens@bips.uni-bremen.de

1  
2  
3  
4 **Keywords:** Germ cell cancer; Socioeconomic Status; Case control study; Occupational  
5 risk factors  
6  
7  
8  
9

10 Word count: 2.398

11 Abstract: 257

12 Summary: 187  
13  
14  
15  
16  
17  
18  
19  
20  
21  
22  
23  
24  
25  
26  
27  
28  
29  
30  
31  
32  
33  
34  
35  
36  
37  
38  
39  
40  
41  
42  
43  
44  
45  
46  
47  
48  
49  
50  
51  
52  
53  
54  
55  
56  
57  
58  
59  
60

For peer review only

## Summary

### Article focus:

- Background: It is controversial whether social position is associated with the risk of testicular cancer. Therefore the aims are a) the classification of social position based on job titles reported in an occupational history, and b) assessment of the association between risk of testicular cancer and job-title based social position.

### Key messages:

- Job-title based social position is not associated with testicular cancer.
- Occupation as farmer or farm worker entails an elevated risk of testicular cancer, possibly due to related exposures.

### Strengths and limitations:

- Occupational social factors were measured on the basis of a detailed lifetime history of occupations. This population based study allows examination of the full spectrum of social differences in the general population.
- The basis for the classification of social position is relatively valid because job histories usually are reported with good accuracy and the information was obtained by in-person interviews,
- A limitation is that the differential response of cases (76%) and controls (57%) may bias the effect estimates if possible selection effects differ between both groups. Also periods of unemployment and illness cannot be ranked by the scales utilised in this study.

**Abstract:**

**Objectives:** Incidence rates for testicular cancer have risen over the last few decades. Findings of an association between the risk of testicular cancer and social factors are controversial. The association of testicular cancer and different indicators of social factors were examined in this study.

**Design:** Case-control study.

**Setting:** Population based multi-centre study in four German regions (city states Bremen and Hamburg, the Saarland region and the city Essen).

**Participants:** The study included 797 control subjects and 269 subjects newly diagnosed with testicular cancer of which 170 cases were classified as seminoma and 99 as nonseminoma. The age of study subjects ranged from 15 to 69 years.

**Methods:** Social factors were based on the achieved educational level, post educational training, occupational sectors according to Erikson-Goldthorpe-Portocarrero (EGP) and the socioeconomic status (SES) on the basis of the International Socio-Economic Index of occupational status (ISEI). Odds ratios [ORs] and corresponding 95% confidence intervals [95%-CIs] were calculated for the whole study sample and for seminoma and nonseminoma separately.

**Results:** An increased testicular cancer risk was observed for subjects with an apprenticeship (OR=1.5 [95%-CI: 0.9-2.5]) or a university degree (OR=1.5 [95%-CI: 0.9-2.6]) relative to those whose education was limited to school. Analysis of occupational sectors revealed an excess risk for farmers and farm related occupations. No clear trend was observed for the analyses according the ISEI-scale.

**Conclusions:** Social factors based on occupational measures were not a risk factor for testicular cancer in this study. The elevated risk in farmers and farm related occupations warrants further research including analysis of occupational exposures.

## Introduction

Subjects affected most by testicular cancer are men between 15 and 40 years of age. For men older than 40 years of age the risk of testicular cancer decreases continuously.[1, 2] The age distribution of testicular cancer is in sharp contrast to other neoplasms for which incidence rises with increasing age. Established risk factors for testicular cancer include a family history of testicular cancer and a history of an undescended testis.[3, 4] Exposure to endocrine disrupting chemicals in an occupational context or *in utero*, has been suggested as a factor in cancer development.[5] The incidence rates of testicular cancer have risen continuously in Western Europe and other industrialized countries, which may be due to changed environmental and life circumstances in these countries. In particular, in Germany the average numbers of testicular cancer per year in the 1980s and 1990s were 3196 and 3836. The corresponding age-standardised incidence rates were 7.7 and 8.9 per 100.000.[6] However, study results on the association of social factors and testicular cancer have been conflicting. Excess risks for higher levels of education or occupations related to higher social class, like administrators and managers and other professionals were observed in some studies.[7-10] Other studies did not observe an association between social status and testicular cancer [11-17] or even observed an inverse association.[18, 19] In one study the association of testicular cancer and socioeconomic status (SES) differed by histological type.[20] A register based study in Finland observed a decrease of testicular cancer incidence rates among subjects of higher social classes and an increase of incidence rates in the lower social classes between 1971 and 1995, leading to a levelling off of the social gradient.[21]

In this study, in addition to educational attainment at school and level of professional training as defined in a previous study[22] further social factors based on job histories were considered. In detail, socioeconomic status (SES) based on the International Socio-Economic Index (ISEI)[23] and social class based on the Erikson-Goldthorpe-Portocarrero (EGP)[24] classification was explored. Both the International Socio-Economic Index (ISEI) of occupation, which is a vertical grouping approach, and the Erikson-Goldthorpe-Portocarrero (EGP) classification of occupations which adopts a class schema, claim that employment relations are basic social characteristics of western society.

## Study subjects and Methods

All participants were registered residents of the city states Bremen and Hamburg, the Saarland region and the city Essen. Study subjects randomly drawn from registration offices had to live in the study regions between July 1995 and December 1997. Incident cases, diagnosed between July 1995 and December 1997, were reported by an active

1  
2  
3 registration system via hospitals and pathologists. In Hamburg cases were also identified  
4 via the state cancer registry.

5  
6 Eligible cases had to have a diagnosis of tumour of the testis (ICD-10: C62.0-C62.9),  
7 epididymis (C63.0), spermatic cord (C63.1) or extragonadal germ cell tumours (C38.3;  
8 C48.0; C71.0-C71.9; ICD-O: M9060-9102).

9  
10 A total of 353 eligible cases and 2014 potential controls were contacted for this study.  
11  
12 Among cases, 54 persons were not reached, 29 persons refused participation. One case  
13 was excluded due to insufficient German language skills. Participation was denied by 552  
14 control subjects, 512 moved or died and 182 persons were never reached.

15  
16 Copies of pathology reports and histological material were obtained from hospitals.  
17  
18 Pathology reports were reviewed centrally and compared with histological material when  
19 available by a reference pathologist to determine the histological type of tumour. Tumours  
20 were classified as seminomas (N=170, 63.2%) or nonseminomas (N=99, 36.8%)  
21 according to Parkin and co-workers.[25] The latter group also included extra-gonadal  
22 germ cell tumours. More detailed descriptions and demographic characteristics of the  
23 participants were published elsewhere.[22, 26-28]

24  
25 Cases and controls had to be between 15 and 69 years of age. An n:m-matching for 5-  
26 year age strata and study region was chosen. To obtain sufficient power in this study, a  
27 matching ratio of 1:4 was realised for the age group 35-69, while for the age strata 15-34  
28 a matching ratio of 1:2 was considered to be sufficient since most cases were expected in  
29 this age group. Inclusion criteria were fulfilled by 269 cases and 918 controls. Cases and  
30 controls were recruited in parallel. For this purpose controls were selected prospectively  
31 according to the expected case distribution. This left 121 controls for which no matching  
32 case interview was obtained.

33  
34 Participants were interviewed face-to-face (N=984, 92.3%) or by telephone (N=82, 7.7%).  
35  
36 Almost all interviews were performed with an index person (N=978, 91.7%). For deceased  
37 subjects or subjects too ill to answer the questions, a next-of-kin interview was solicited.  
38 The interview entailed questions about medical conditions since childhood, chemical and  
39 physical exposures and an occupational biography for every job held 6 months or longer.  
40 For each employment period, the job title and industry and a brief summary of the job  
41 tasks were assessed. Each job was assigned a five-digit *International Standard Code of*  
42 *Occupations* (ISCO)[29] and a five-digit industry code (NACE).[30]

### 53 **Assessment of Social Factors**

54  
55 Measures of social factors in this study were level of educational attainment at school,  
56 level of professional training, occupational sector based on EGP and SES based on ISEI.  
57  
58  
59  
60

1  
2  
3 Job title codes (ISCO) were linked to the *International Socio-Economic Index of*  
4 *Occupational Status* (ISEI).[23] The ISEI assigns values between 10 and 90 to job titles  
5 with respect to education and income. Judges, lawyers and physicians achieve the  
6 highest values, while unskilled labourers in agriculture and housekeepers the lowest  
7 values. In this scale a continuous hierarchical approach the distinctions of work related  
8 tasks and social patterns disappear in favour of a single parameter. The ISEI score  
9 provides a mechanism for ranking occupations related to both the level of education  
10 required and the income earned.[23] ISEI-Scores for the maximum ever achieved, the  
11 longest held and the last job were used to quantify the possible effect of socioeconomic  
12 status on testicular cancer risk. ISEI values were grouped into five categories employing  
13 the best possible equal distribution of controls.  
14  
15

16 For the present analyses, ISCO codes were aggregated according to occupational sector  
17 and training required (EGP) assuming that internal homogeneity within a category is great  
18 and that a definable external social heterogeneity to members of other categories exists  
19 (24). The EGP is based on occupational group, required training, self  
20 support/independence, social mobility and leadership. Each reported job was classified  
21 into one of the following ten occupational categories: (I) higher service (includes mostly  
22 professionals, large enterprise employers and higher managers (>10 subordinates)); (II)  
23 lower service (includes mostly associate professionals, lower managers (1-10  
24 subordinates), higher sales); (III) routine clericals/sales (includes routine clerical and sales  
25 workers); (IV) small employers (includes small entrepreneurs (1-10 subordinates); (V)  
26 self-employed (own account workers, no employees, artists); (VI) manual foremen  
27 (manual workers with supervisory status (>1 subordinate)); (VII) skilled manual (mostly  
28 craft workers, some skilled service, skilled machine operators, also gardeners); (VIII)  
29 semi-unskilled manual (mostly machine operators, elementary sales services and state  
30 work creation scheme); (IX) farm workers (employed farm workers, irrespective of skill  
31 level; also family farm workers); (X) farmers/farm managers (self-employed and  
32 supervisory farm workers, irrespective of skill level). Categories I and II, III, IV and V, VI  
33 and VII, IX and X were collapsed into for analysis.  
34  
35

36 Occupational histories excluded jobs starting within one year before the case diagnosis or  
37 before the first mailing to controls. For analysis of first job, last job, longest held job, job  
38 highest ranked and job lowest ranked the highest category formed the reference. Subjects  
39 which had never worked were excluded from analysis, except for the ever/never analysis  
40 of EGP. For this analyses, those subjects who did not work in the specific field under  
41 consideration were used as reference group in the ever/never analysis.  
42  
43

44 Educational level according to the German school system was classified into four levels  
45 ( $\leq 9$  [no school degree, Sonderschulabschluss, Hauptschulabschluss], 10 [mittlere Reife],  
46  
47  
48  
49  
50  
51  
52  
53  
54  
55  
56  
57  
58  
59  
60



12 [Fachabitur] and 13 [Abitur] years of school education). In addition, the highest professional post school level (none, apprenticeship, university or college degree, others) was analysed.

### Statistical Analysis

Odds Ratios (OR) and 95%-confidence intervals [95%-CI] were calculated stratified for the five year age strata and study centres. All analyses were carried out for the whole study and by the two main histological subgroups. Odds ratios and corresponding confidence intervals were estimated by the maximum likelihood method using the procedure PHREG for conditional logistic regression analysis. The level of statistical significance was defined as  $p < 0.05$  (two-sided). All analyses were carried out using SAS 8.2. ORs were not reported if a given category included less than three cases.

### Results

The proportion of medically confirmed cryptorchidism was higher in cases (4.8%) than in controls (1.0%). Among seminoma cases the proportion of medically confirmed cryptorchidism was 4.7% and 1.1% among the controls. In nonseminoma cases the prevalence of medical confirmed cryptorchidism was 5.1% while in the controls the prevalence was 1.0%. Overall, nonseminoma cases were on average 5 years younger than seminoma cases (nonseminoma:  $31.1 \pm 8.4$ ; seminoma:  $36.9 \pm 8.8$ ; controls:  $38.0 \pm 11.7$  [mean $\pm$ sd]) (data not shown).

The distribution of number of occupations for cases and controls is shown in Table 1. Seven cases (six nonseminoma cases; one seminoma case) and 20 controls were still attending school or were students with no job history at the time of diagnosis (case) or first mailing (controls). Job histories of nonseminoma cases lasted  $14.6 \pm 8.6$  years, of seminoma cases  $21.5 \pm 12.6$  and of controls  $21.0 \pm 12.9$  years [mean $\pm$ sd]. Except for the nonseminoma cases the number of occupational periods did not differ between cases and controls.

Table 1: Frequency of economically active periods for cases and controls for whole study and separated for analyses of age groups and histology.

| Frequency      | Cases N=269 |      | Controls N=797 |      |
|----------------|-------------|------|----------------|------|
| Complete Study | N           | %    | N              | %    |
| 0              | 7           | 2.6  | 20             | 2.5  |
| 1-2            | 108         | 40.2 | 324            | 40.7 |
| 3-4            | 98          | 36.4 | 281            | 35.3 |
| 5+             | 56          | 20.8 | 172            | 21.6 |
|                |             |      |                |      |
| Seminoma       | Cases N=170 |      | Controls N=725 |      |
| 0              | 1           | 0.6  | 13             | 1.8  |
| 1-2            | 43          | 25.3 | 192            | 26.5 |
| 3-4            | 74          | 43.5 | 299            | 41.2 |
| 5+             | 52          | 30.6 | 221            | 30.5 |

|             | Cases N=99 |      | Controls N=682 |      |
|-------------|------------|------|----------------|------|
| Nonseminoma |            |      |                |      |
| 0           | 6          | 6.1  | 20             | 2.9  |
| 1-2         | 37         | 37.4 | 193            | 28.3 |
| 3-4         | 40         | 40.4 | 274            | 40.2 |
| 5+          | 16         | 16.2 | 195            | 28.6 |

Stratification by educational level and professional degree is shown in Table 2. Risk estimates were not elevated for higher educational levels in the complete study group or in the histological subgroups. Subjects with professional degrees (i.e. apprenticeship, technical colleges, study at university and university for applied sciences) in the whole study group and in the analysis of seminoma cases as compared to subjects without professional training were at higher risk. For nonseminoma cases and their matched controls no increased risk was observed for professional training. No risk was observed for being employed before the age of 18 (OR=1.0; 95%-CI 0.7-1.4) (data not shown).

Table 2: Distribution of cases and controls by educational level and professional degrees and corresponding Odds Ratios with 95% confidence intervals

|                       | Cases |      | Controls |      | OR (95%-CI)      |
|-----------------------|-------|------|----------|------|------------------|
|                       | N     | %    | N        | %    |                  |
| <b>Complete Study</b> | (269) |      | (797)    |      |                  |
| Years at school       |       |      |          |      |                  |
| ≤9                    | 89    | 33.1 | 304      | 38.1 | 1.0 <sup>†</sup> |
| 10                    | 61    | 22.7 | 192      | 24.1 | 0.8 (0.6-1.3)    |
| 12                    | 25    | 9.3  | 78       | 9.8  | 0.9 (0.5-1.5)    |
| 13                    | 94    | 34.9 | 222      | 27.9 | 1.0 (0.7-1.5)    |
| Unknown               | 0     | 0.0  | 1        | 0.1  |                  |
| Professional training |       |      |          |      |                  |
| None                  | 24    | 8.9  | 95       | 11.9 | 1.0 <sup>†</sup> |
| Apprenticeship        | 164   | 61.0 | 485      | 60.9 | 1.5 (0.9-2.5)    |
| University degree     | 62    | 23.1 | 154      | 19.3 | 1.5 (0.9-2.6)    |
| Other                 | 19    | 7.1  | 63       | 7.9  | 0.9 (0.4-1.9)    |
| <b>Seminoma</b>       | (170) |      | (725)    |      |                  |
| Years at school       |       |      |          |      |                  |
| ≤9                    | 60    | 35.3 | 267      | 36.8 | 1.0 <sup>†</sup> |
| 10                    | 39    | 22.9 | 180      | 24.8 | 0.8 (0.5-1.4)    |
| 12                    | 17    | 10.0 | 75       | 10.3 | 0.9 (0.5-1.6)    |
| 13                    | 54    | 31.8 | 202      | 27.9 | 1.0 (0.6-1.6)    |
| Unknown               | 0     | 0.0  | 1        | 0.1  |                  |
| Professional training |       |      |          |      |                  |
| None                  | 12    | 7.1  | 88       | 12.1 | 1.0 <sup>†</sup> |
| Apprenticeship        | 111   | 65.3 | 446      | 61.5 | 2.2 (1.1-4.3)    |
| University degree     | 40    | 23.5 | 142      | 19.6 | 1.8 (0.9-3.7)    |
| Other                 | 7     | 4.1  | 49       | 6.8  | 1.6 (0.5-5.1)    |
| <b>Nonseminoma</b>    | (99)  |      | (682)    |      |                  |
| Years at school       |       |      |          |      |                  |
| ≤9                    | 29    | 29.3 | 225      | 33.2 | 1.0 <sup>†</sup> |
| 10                    | 22    | 22.2 | 172      | 25.4 | 0.8 (0.4-1.5)    |
| 12                    | 8     | 8.1  | 73       | 10.8 | 0.8 (0.3-1.9)    |
| 13                    | 40    | 40.4 | 206      | 30.4 | 1.1 (0.6-1.9)    |
| Unknown               | 0     | 0.0  | 1        | 0.1  |                  |
| Professional training |       |      |          |      |                  |

|                   |    |      |     |      |                  |
|-------------------|----|------|-----|------|------------------|
| None              | 12 | 12,1 | 80  | 11,7 | 1.0 <sup>†</sup> |
| Apprenticeship    | 53 | 53,5 | 400 | 58,7 | 0.9 (0.5-1.9)    |
| University degree | 22 | 22,2 | 140 | 20,5 | 1.1 (0.5-2.5)    |
| Other             | 12 | 12,1 | 62  | 9,1  | 0.5 (0.2-1.4)    |

<sup>†</sup>Reference.

No difference between cases and controls was observed (cases: mean score 42.8, median score 39; controls: mean score 42.4, median score 39) (data not shown). Risk estimates by ISEI-scores are presented in Table 3. Analyses of the maximum ISEI score reached during the lifetime showed no increased risks. A modest increased risk was observed for seminoma cases where the risk increase was restricted to the lowest category (OR=1.4; 95%-CI 0.8-2.4). For nonseminoma study sample no increased risk was observed as compared to the reference category. The analyses by ISEI of the job held longest and the last job held revealed no clear trends.

Table 3: Distribution and frequency for achieved maximum ISEI scores and ISEI scores for the longest and last held job for whole study population and for histologic subgroups and corresponding Odds Ratios.

| <b>Complete Study</b>   | <b>Cases</b> |          | <b>Controls</b> |          |                    |
|-------------------------|--------------|----------|-----------------|----------|--------------------|
| <b>Maximum</b>          | <b>N</b>     | <b>%</b> | <b>N</b>        | <b>%</b> | <b>OR (95%-CI)</b> |
| [16-37)                 | 59           | 22.5     | 156             | 19.6     | 1.1 [0.7-1.8]      |
| [37-44)                 | 48           | 18.3     | 172             | 21.6     | 0.9 [0.5-1.4]      |
| [44-55)                 | 51           | 19.5     | 151             | 19.0     | 1.0 [0.6-1.6]      |
| [55-66)                 | 51           | 19.5     | 151             | 19.0     | 0.9 [0.6-1.5]      |
| [66-88]                 | 53           | 20.2     | 147             | 18.4     | 1 <sup>†</sup>     |
| Missing                 | 7            |          | 20              |          |                    |
| <b>Last held job</b>    |              |          |                 |          |                    |
| [16-37)                 | 96           | 35.7     | 264             | 33.3     | 0.9 [0.6-1.4]      |
| [37-44)                 | 36           | 13.8     | 132             | 16.6     | 0.8 [0.5-1.3]      |
| [44-55)                 | 39           | 14.1     | 145             | 18.2     | 0.7 [0.4-1.1]      |
| [55-66)                 | 44           | 16.4     | 117             | 14.7     | 0.9 [0.6-1.5]      |
| [66-88]                 | 47           | 17.5     | 119             | 14.9     | 1 <sup>†</sup>     |
| Missing                 | 7            |          | 20              |          |                    |
| <b>Longest held job</b> |              |          |                 |          |                    |
| [16-37)                 | 104          | 38.7     | 277             | 34.9     | 0.9 [0.6-1.5]      |
| [37-44)                 | 41           | 15.2     | 150             | 18.8     | 0.8 [0.5-1.3]      |
| [44-55)                 | 33           | 12.3     | 144             | 18.1     | 0.6 [0.3-1.0]      |
| [55-66)                 | 43           | 16.0     | 106             | 13.3     | 1.0 [0.6-1.7]      |
| [66-88]                 | 41           | 15.2     | 100             | 12.6     | 1 <sup>†</sup>     |
| Missing                 | 7            | 2.6      | 20              | 2.4      |                    |
| <b>SEMINOMA</b>         | <b>Cases</b> |          | <b>Controls</b> |          |                    |
| <b>Maximum</b>          | <b>N</b>     | <b>%</b> | <b>N</b>        | <b>%</b> |                    |
| [16-37)                 | 37           | 21.9     | 141             | 19.9     | 1.4 [0.8-2.4]      |
| [37-44)                 | 32           | 18.9     | 159             | 22.3     | 0.9 [0.5-1.6]      |
| [44-55)                 | 32           | 18.9     | 137             | 19.2     | 0.9 [0.5-1.6]      |
| [55-66)                 | 32           | 18.9     | 141             | 19.8     | 0.9 [0.5-1.6]      |
| [66-88]                 | 36           | 21.3     | 134             | 18.8     | 1 <sup>†</sup>     |
| Missing                 | 1            |          | 13              |          |                    |
| <b>Last held job</b>    |              |          |                 |          |                    |
| [16-37)                 | 59           | 34.9     | 240             | 33.8     | 0.9 [0.6-1.6]      |
| [37-44)                 | 24           | 14.2     | 123             | 17.3     | 0.8 [0.5-1.5]      |
| [44-55)                 | 25           | 14.8     | 133             | 18.7     | 0.7 [0.4-1.3]      |
| [55-66)                 | 29           | 17.2     | 109             | 15.3     | 0.9 [0.5-1.6]      |
| [66-88]                 | 32           | 18.9     | 107             | 15.0     | 1 <sup>†</sup>     |
| <b>Longest held job</b> |              |          |                 |          |                    |
| [16-37)                 | 64           | 37.7     | 259             | 35.9     | 0.9 [0.5-1.5]      |

|         |    |      |     |      |                |
|---------|----|------|-----|------|----------------|
| [37-44) | 29 | 17.1 | 133 | 18.3 | 0.9 [0.5-1.5]  |
| [44-55) | 21 | 12.4 | 128 | 17.7 | 0.5 [0.3-1.0]  |
| [55-66) | 25 | 14.7 | 101 | 13.9 | 0.8 [0.4-1.5]  |
| [66-88] | 30 | 17.7 | 91  | 12.6 | 1 <sup>†</sup> |
| Missing | 1  |      | 12  |      |                |

Table 3: continued

| <b>NONSEMINOMA</b>      |       |      |          |      |                |
|-------------------------|-------|------|----------|------|----------------|
|                         | Cases |      | Controls |      |                |
| <b>Maximum</b>          | N     | %    | N        | %    |                |
| [16-37)                 | 22    | 23.7 | 128      | 19.5 | 0.9 [0.4-1.9]  |
| [37-44)                 | 16    | 17.2 | 148      | 22.3 | 0.7 [0.3-1.5]  |
| [44-55)                 | 19    | 20.4 | 129      | 19.5 | 0.9 [0.5-1.9]  |
| [55-66)                 | 19    | 20.4 | 133      | 20.1 | 1.0 [0.5-1.9]  |
| [66-88]                 | 17    | 18.3 | 124      | 18.7 | 1 <sup>†</sup> |
| Missing                 | 6     |      |          |      |                |
| <b>Last held job</b>    |       |      |          |      |                |
| [16-37)                 | 37    | 39.8 | 223      | 33.8 | 0.9 [0.4-1.7]  |
| [37-44)                 | 12    | 14.0 | 110      | 16.6 | 0.7 [0.3-1.6]  |
| [44-55)                 | 14    | 14.0 | 126      | 19.0 | 0.7 [0.3-1.5]  |
| [55-66)                 | 15    | 16.1 | 103      | 15.5 | 0.9 [0.4-2.0]  |
| [66-88]                 | 15    | 16.1 | 100      | 15.1 | 1 <sup>†</sup> |
| <b>Longest held job</b> |       |      |          |      |                |
| [16-37)                 | 40    | 40.4 | 230      | 33.9 | 1.1 [0.5-2.2]  |
| [37-44)                 | 12    | 12.1 | 130      | 19.1 | 0.7 [0.3-1.7]  |
| [44-55)                 | 12    | 12.1 | 128      | 18.8 | 0.6 [0.3-1.5]  |
| [55-66)                 | 18    | 18.2 | 91       | 13.3 | 1.4 [0.6-3.3]  |
| [66-88]                 | 11    | 11.1 | 83       | 12.2 | 1 <sup>†</sup> |
| Missing                 | 6     | 6.1  | 19       | 2.8  |                |

<sup>†</sup>Reference.

ORs by occupational sectors (EGP) are shown in table 4. An increased risk for testicular cancer was observed for ever held an agriculture related job (OR=2.2 95%-CI 1.1-4.2). For seminoma cases the effect was of the same strength (OR=2.4 95%-CI 1.1-5.0), while for nonseminoma cases the OR estimate was smaller (OR=1.6 95%-CI 0.5-4.8). For all other classes no increased risk was observed. This pattern was replicated for almost all analysis presented in table 4. Compared with subjects in the highest EGP quintiles, increased risks were observed for category IX-X for first, last and occupation with highest category ever.

Table 4: Stratification and Odds Ratios with 95%-CI of occupational sectors according to Erikson, Goldthorpe and Protocarero for complete study group and histologic subgroups

| Category <sup>1</sup> | Complete Study |      |          |      |                | Seminoma |      |          |      |                | Nonseminoma <sup>#</sup> |      |          |      |               |
|-----------------------|----------------|------|----------|------|----------------|----------|------|----------|------|----------------|--------------------------|------|----------|------|---------------|
|                       | Cases          |      | Controls |      | OR [95%-CI]    | Cases    |      | Controls |      | OR [95%-CI]    | Cases                    |      | Controls |      | OR [95%-CI]   |
|                       | N              | %    | N        | %    |                | N        | %    | N        | %    |                | N                        | %    | N        | %    |               |
| First held job        |                |      |          |      |                |          |      |          |      |                |                          |      |          |      |               |
| I-II                  | 25             | 9.5  | 69       | 8.9  | 1              | 15       | 8.9  | 63       | 8.8  | 1              | 10                       | 10.8 | 60       | 9.1  | 1             |
| III-V                 | 40             | 15.3 | 140      | 18.0 | 0.9 [0.5-1.5]  | 24       | 14.2 | 126      | 17.7 | 0.9 [0.4-1.8]  | 16                       | 17.2 | 126      | 19.1 | 0.8 [0.3-1.9] |
| VI-VII                | 134            | 51.1 | 404      | 52.0 | 1.1 [0.7-1.9]  | 90       | 53.3 | 372      | 52.2 | 1.3 [0.7-2.4]  | 44                       | 47.3 | 335      | 50.8 | 0.9 [0.4-1.9] |
| VIII                  | 56             | 21.4 | 148      | 19.0 | 1.1 [0.8-1.4]  | 34       | 20.1 | 138      | 19.4 | 1.1 [0.8-1.6]  | 22                       | 23.7 | 128      | 19.4 | 1.0 [0.6-1.5] |
| IX-X                  | 7              | 2.7  | 16       | 2.1  | 1.6 [0.5-4.6]  | 6        | 3.6  | 13       | 1.8  | 2.1 [0.6-6.7]  | 1                        | 1.1  | 11       | 1.7  | -             |
| Last held job         |                |      |          |      |                |          |      |          |      |                |                          |      |          |      |               |
| I-II                  | 70             | 26.7 | 172      | 22.1 | 1              | 45       | 26.6 | 155      | 21.8 | 1              | 25                       | 26.9 | 150      | 22.7 | 1             |
| III-V                 | 53             | 20.2 | 192      | 24.7 | 0.7 [0.4-1.0]  | 34       | 20.1 | 180      | 25.3 | 0.7 [0.4-1.2]  | 19                       | 20.4 | 162      | 24.5 | 0.6 [0.3-1.1] |
| VI-VII                | 82             | 31.3 | 243      | 31.3 | 0.9 [0.6-1.3]  | 55       | 32.5 | 223      | 31.3 | 1.0 [0.6-1.6]  | 27                       | 29.0 | 205      | 31.1 | 0.7 [0.4-1.3] |
| VIII                  | 52             | 19.8 | 165      | 21.2 | 0.9 [0.7-1.1]  | 31       | 18.3 | 151      | 21.2 | 0.9 [0.7-1.2]  | 21                       | 22.6 | 138      | 20.9 | 0.9 [0.6-1.2] |
| IX-X                  | 5              | 1.9  | 5        | 0.6  | 3.0 [0.8-11.7] | 4        | 2.4  | 3        | 0.4  | 4.3 [0.9-20.8] | 1                        | 1.1  | 5        | 0.8  | -             |
| Longest held job      |                |      |          |      |                |          |      |          |      |                |                          |      |          |      |               |
| I-II                  | 54             | 20.6 | 145      | 18.7 | 1              | 37       | 21.9 | 133      | 18.7 | 1              | 17                       | 18.3 | 125      | 18.9 | 1             |
| III-V                 | 46             | 17.6 | 166      | 21.4 | 0.8 [0.5-1.2]  | 27       | 16.0 | 154      | 21.6 | 0.7 [0.4-1.2]  | 19                       | 20.4 | 139      | 21.1 | 0.8 [0.4-1.6] |
| VI-VII                | 101            | 38.5 | 287      | 36.9 | 1.1 [0.7-1.6]  | 70       | 41.4 | 261      | 36.7 | 1.2 [0.8-2.0]  | 31                       | 33.3 | 242      | 36.7 | 0.8 [0.4-1.5] |
| VIII                  | 56             | 21.4 | 171      | 22.0 | 0.9 [0.8-1.2]  | 32       | 18.9 | 156      | 21.9 | 0.9 [0.7-1.2]  | 24                       | 25.8 | 146      | 22.1 | 1.0 [0.7-1.4] |
| IX-X                  | 5              | 1.9  | 8        | 1.0  | 1.3 [0.4-4.1]  | 3        | 1.8  | 8        | 1.1  | 1.0 [0.2-4.1]  | 2                        | 2.2  | 8        | 1.2  | -             |
| Lowest category ever  |                |      |          |      |                |          |      |          |      |                |                          |      |          |      |               |
| I-II                  | 18             | 6.9  | 42       | 5.4  | 1              | 10       | 5.9  | 38       | 5.3  | 1              | 8                        | 8.6  | 37       | 5.6  | 1             |
| III-V                 | 28             | 10.7 | 101      | 13.0 | 0.7 [0.3-1.4]  | 18       | 10.7 | 89       | 12.5 | 0.8 [0.3-2.0]  | 10                       | 10.8 | 90       | 13.6 | 0.5 [0.2-1.5] |
| VI-VII                | 85             | 32.4 | 241      | 31.0 | 1.0 [0.5-1.8]  | 54       | 32.0 | 222      | 31.2 | 1.1 [0.5-2.5]  | 31                       | 33.3 | 200      | 30.3 | 0.8 [0.3-1.8] |
| VIII                  | 130            | 49.6 | 392      | 50.5 | 0.9 [0.7-1.3]  | 86       | 50.9 | 362      | 50.8 | 1.0 [0.7-1.5]  | 44                       | 47.3 | 332      | 50.3 | 0.8 [0.5-1.3] |
| IX-X                  | 1              | 0.4  | 1        | 0.1  | -              | 1        | 0.6  | 1        | 0.1  | -              | 0                        | 0.0  | 1        | 0.2  | -             |
| Highest category ever |                |      |          |      |                |          |      |          |      |                |                          |      |          |      |               |
| I-II                  | 86             | 32.8 | 231      | 29.7 | 1              | 58       | 34.3 | 211      | 29.6 | 1              | 28                       | 30.1 | 201      | 30.5 | 1             |
| III-V                 | 58             | 22.1 | 194      | 25.0 | 0.8 [0.5-1.2]  | 35       | 20.7 | 183      | 25.7 | 0.7 [0.5-1.2]  | 23                       | 24.7 | 167      | 25.3 | 0.8 [0.4-1.5] |
| VI-VII                | 105            | 40.1 | 307      | 39.5 | 1.1 [0.7-1.5]  | 71       | 42.0 | 276      | 38.8 | 1.2 [0.8-1.8]  | 34                       | 36.6 | 257      | 38.9 | 0.9 [0.5-1.5] |
| VIII                  | 10             | 3.8  | 40       | 5.1  | 0.8 [0.5-1.2]  | 2        | 1.2  | 38       | 5.3  | 0.5 [0.3-1.0]  | 8                        | 8.6  | 31       | 4.7  | 1.0 [0.6-1.6] |
| IX-X                  | 3              | 1.1  | 5        | 0.6  | 2.2 [0.5-10.4] | 3        | 1.8  | 4        | 0.6  | 3.5 [0.7-17.7] | 0                        | 0.0  | 4        | 0.6  | -             |

1  
2  
3  
4  
5  
6  
7  
8  
9  
10  
11  
12  
13  
14  
15  
16  
17  
18  
19  
20  
21  
22  
23  
24  
25  
26  
27  
28  
29  
30  
31  
32  
33  
34  
35  
36  
37  
38  
39  
40  
41  
42  
43  
44  
45  
46  
47  
48  
49

Table 4: continued.

|               |     |      |     |      |               |     |      |     |      |               |    |      |     |      |               |
|---------------|-----|------|-----|------|---------------|-----|------|-----|------|---------------|----|------|-----|------|---------------|
| Ever held job |     |      |     |      |               |     |      |     |      |               |    |      |     |      |               |
| I-II          | 86  | 32.0 | 231 | 29.0 | 1.1 [0.8-1.5] | 58  | 34.1 | 211 | 29.1 | 1.1 [0.7-1.5] | 28 | 28.3 | 201 | 29.5 | 1.2 [0.7-1.9] |
| III-V         | 92  | 34.2 | 308 | 38.6 | 0.7 [0.5-1.0] | 58  | 34.1 | 286 | 39.4 | 0.6 [0.4-0.9] | 34 | 34.3 | 268 | 39.3 | 0.9 [0.5-1.4] |
| VI-VII        | 166 | 61.7 | 494 | 62.0 | 1.2 [0.9-1.6] | 110 | 64.7 | 453 | 62.5 | 1.2 [0.8-1.7] | 56 | 56.6 | 413 | 60.6 | 1.1 [0.7-1.7] |
| VIII          | 130 | 48.3 | 392 | 49.2 | 1.0 [0.7-1.3] | 86  | 50.6 | 362 | 49.9 | 1.0 [0.7-1.4] | 44 | 44.4 | 333 | 48.8 | 1.0 [0.6-1.5] |
| IX-X          | 17  | 6.3  | 30  | 3.8  | 2.2 [1.1-4.2] | 13  | 7.6  | 23  | 3.2  | 2.4 [1.1-5.0] | 4  | 4.0  | 22  | 3.2  | 1.6 [0.5-4.8] |

<sup>†</sup>Categories were assigned as follows: I=Higher service (includes mostly professionals, large enterprise employers and higher managers (>10 subordinates)); II=Lower service (Includes mostly associate professionals, Lower managers (1-10 subordinates), higher Sales); III=Routine clericales/sales (Includes routine clerical and sales workers); IV=Small employers (Includes small entrepreneurs (1-10 subordinates); V=Independent (Own account workers, no employees, artists); VI=Manual foremen (Manual workers with supervisory status (>1 subordinate)); VII=Skilled manual (Mostly craft workers, some skilled service, skilled machine operators, also gardeners); VIII=Semi-unskilled manual (Mostly machine operators, elementary sales services and state work creation scheme); XI=Farm workers‡ (Employed farm workers, irrespective of skill level; also family farm workers); X=Farmers/Farm managers (Self-employed and supervisory farm workers, irrespective of skill level). Frequencies and calculations for social status ever held. ‡: only Farm workers and forestry workers.

For peer review only

## Discussion

Different methods of assigning social position may produce different results in terms of trends in health and inequality.[31, 32] Four indicators of social groupings were analysed in this study. School education was not observed to have an impact on testicular cancer risk. The elevated risk observed for professional training as compared to no training was restricted to the seminoma subgroup. Overall, there was no hint in this study that examined social factors are associated with testicular cancer. This result is in line with other newer studies.[11, 17]

Elevated risks in association with EGP other than agriculture were not observed in this study. An excess risk in agriculture and related occupations was also observed in several studies[9, 33-35] Increased risks in agriculture and related occupations are not explained by social factors but rather with exposures such as pesticides,[33, 35] fertilizers[36, 37] or contact with farm animals and zoonotic infections[33] which were not in the scope of this study.

No increased risks were observed for non-agricultural occupational sectors based on the EGP which is in line with other studies.[14, 21, 38] Also, no evidence was found that socioeconomic status (ISEI) is associated with testicular cancer. This indicates that factors other than occupation as a mediating variable between income and education may be responsible for testicular cancer risk.

Neither EGP categories nor continuous hierarchy by ISEI were a risk factor for testicular cancer in this study. If a social gradient for testicular cancer in Germany existed in the past and exposures were associated with this gradient, this gradient was attenuated by omnipresent exposures that do not differ by social circumstances. The rising trends of testicular cancer in industrialised countries may be an indirect indication for alignment of social dependent exposures.

This study has several limitations. First, the study suffered from low response (cases 76%, controls 57%). For the study region of Hamburg participation was lower among controls with lower education which might have resulted in an overestimation of the risk in the lower SES status groups. Hence, it is possible that a participation bias might have biased the effect estimates. Sensitivity analysis by leaving out Hamburg revealed similar findings, which could also be explained by specifics of the population structure of Hamburg.

Second, misclassification of social status is likely to have occurred. As the assessment of the social status is not based on a dichotomous variable, the direction of bias due to non-differential misclassification cannot be predicted.

Third, periods of unemployment and illness cannot be ranked by both scales utilised in this study. Non-consideration of such periods may lead to an underestimation of any social difference.[39]

1  
2  
3 The strength of this study is to measure occupational social factors on the basis of full  
4 detailed life history of occupations. This information was obtained by in-person interviews.  
5 Population based controls were used in this study, which permits full examination of social  
6 differences. Study subjects were not aware of this study hypothesis, and occupational  
7 biography is an unprejudiced variable, so reporting bias is not likely to occur. Different  
8 possible confounding variables were considered by adjusting for post-educational degree  
9 or medical confirmed undescended testis and job frequency. However, the results were  
10 stable in all analyses.  
11  
12  
13  
14  
15

### 16 17 18 **Conclusion**

19 The absence of an effect was not specific to the ISEI score, as another occupational  
20 scaling method, the EGP, was not related to testicular cancer, except farming and farm  
21 related working. It is unclear how this negative finding for occupation can be explained,  
22 but it may point to different social indicators telling different things about groups differing in  
23 age or other characteristics. The findings support the hypothesis that social inequalities in  
24 testicular cancer are not be based upon differences in occupational sectors or derived  
25 SES. More information is needed on the specific social correlates (e.g. work  
26 characteristics, living areas), since education and occupation are not only indicators of  
27 access to material properties, but also correlates with psychosocial properties.  
28  
29  
30  
31  
32  
33  
34  
35

36 **Contributorship statement:** DIC, AS, K-HJ and WA contributed substantially to the  
37 conception of this manuscript and/or the interpretation of the data. These co-authors, as  
38 well as CS, IJ, CB-E and TB also contributed with the revision and final approval of the  
39 version to be published.  
40  
41  
42  
43  
44  
45

46 **Grant support:** Federal Ministry for Education and Research (BMBF no. 01HP 684/8).

47 **Conflict of interest:** None declared.

48 **Data sharing statement:** No additional unpublished data from this study.  
49  
50  
51  
52  
53  
54  
55  
56  
57  
58  
59  
60



## Reference List

1 Bergström R, Adami HO, Möhner M, et al. Increase in testicular cancer incidence in six European countries: a birth cohort phenomenon. *J Natl Cancer Inst* 1996;**88**:727-33.

2 Liu S, Semenciw R, Waters C, et al. Clues to the aetiological heterogeneity of testicular seminomas and non-seminomas: time trends and age-period-cohort effects. *Int J Epidemiol* 2000;**29**:826–31.

3 Pottern LM, Brown LM, Hoover RN, et al. Testicular cancer risk among young men: role of cryptorchidism and inguinal hernia. *J Natl Cancer Inst* 1985;**74**:377-81.

4 Stang A, Ahrens W, Broman K, et al. Undescended testis and the risk of testicular cancer: importance of source and classification of exposure information. *Int J Epidemiol* 2001;**30**:1050-6.

5 Schottenfeld D. Testicular cancer. In: Schottenfeld D, Fraumeni JF, eds. *Cancer epidemiology and prevention*. New York: Oxford University Press 1996: 1205-19.

6 Krebsneuerkrankungen in Deutschland. URL: [www.rki.de](http://www.rki.de) 2010.

7 Rimpela AH, Pukkala EI. Cancers of affluence: positive social class gradient and rising incidence trend in some cancer forms. *Soc Sci Med* 1987;**24**:601-6.

8 Prener A, Hsieh CC, Engholm G, et al. Birth order and risk of testicular cancer. *Cancer Causes Control* 1992;**3**:265-72.

9 Van den Eeden SK, Weiss NS, Strader CH, et al. Occupation and the occurrence of testicular cancer. *Am J Ind Med* 1991;**19**:327-37

10 Gallagher RP, Huchcroft S, Phillips N, et al. Physical activity, medical history, and risk of testicular cancer (Alberta and British Columbia, Canada). *Cancer Causes Control* 1995;**6**:398-406.

11 Brown LM, Pottern LM, Hoover RN. Testicular cancer in young men: the search for causes of the epidemic increase in the United States. *J Epidemiol Community Health* 1987;**41**:349-54.

12 Davies TW, Palmer CR, Ruja E, Lipscombe JM. Adolescent milk, dairy product and fruit consumption and testicular cancer. *Br J Cancer* 1996;**74**:657-60.

- 1  
2  
3 13 Haughey BP, Graham S, Brasure J, et al. The epidemiology of testicular cancer in  
4 upstate New York. *Am J Epidemiol* 1989;**130**:25-36.  
5  
6  
7 14 Marsa K, Johnsen NF, Bidstrup PE, et al. Social inequality and incidence of and  
8 survival from male genital cancer in a population-based study in Denmark, 1994-2003.  
9  
10  
11 *Eur J Cancer* 2008;**44**:2018-29.  
12  
13 15 Moller H, Skakkebaek NE. Risks of testicular cancer and cryptorchidism in relation to  
14 socio-economic status and related factors: case-control studies in Denmark. *Int J Cancer*  
15 1996;**66**:287-93.  
16  
17  
18 16 Petridou E, Roukas KI, Dessypris N, et al. Baldness and other correlates of sex  
19 hormones in relation to testicular cancer. *Int J Cancer* 1997;**71**:982-5.  
20  
21  
22 17 United Kingdom Testicular Cancer Study Group. Aetiology of testicular cancer:  
23 association with congenital abnormalities, age at puberty, infertility, and exercise. United  
24 Kingdom Testicular Cancer Study Group. *BMJ* 1994;**308**(6941):1393-9.  
25  
26  
27  
28 18 Dusek L, Abrahamova J, Lakomy R, et al. Multivariate analysis of risk factors for  
29 testicular cancer: a hospital-based case-control study in the Czech Republic. *Neoplasma*  
30 2008;**55**:356-68.  
31  
32  
33  
34 19 Walschaerts M, Muller A, Auger J, et al. Environmental, occupational and familial risks  
35 for testicular cancer: a hospital-based case-control study. *Int J Androl* 2007;**30**:222-9.  
36  
37  
38 20 Hayes RB, Brown LM, Pottern LM, et al. Occupation and risk for testicular cancer: a  
39 case-control study. *Int J Epidemiol* 1990;**19**:825-31.  
40  
41  
42  
43 21 Pukkala E, Weiderpass E. Socio-economic differences in incidence rates of cancers of  
44 the male genital organs in Finland, 1971-95. *Int J Cancer* 2002;**102**:643-8.  
45  
46  
47 22 Stang A, Ahrens W, Baumgardt-Elms C, et al. Adolescent milk fat and galactose  
48 consumption and testicular germ cell cancer. *Cancer Epidemiol Biomarkers Prev*  
49 2006;**15**:2189-95.  
50  
51  
52  
53 23 Ganzeboom HBG, Degraaf PM, Treiman DJ, et al. A standard international socio-  
54 economic index of occupational status. *Social Science Research* 1992;**21**:1-56.  
55  
56  
57  
58  
59  
60

- 1  
2  
3 24 Erikson R, Goldthorpe JH, Portocarero L. Intergenerational class mobility and the  
4 convergence thesis: England, France and Sweden. *Br J Sociol* 1983;**34**:303-43.  
5  
6 25 Parkin DM, Shanmugaratnam K, Sobin L, et al. Histological groups for comparative  
7 studies. Report 31. Lyon: International Agency for Research on Cancer 1998  
8  
9 26 Broman K, Stang A, Baumgardt-Elms C, et al. Testicular, other genital, and breast  
10 cancers in first-degree relatives of testicular cancer patients and controls. *Cancer*  
11 *Epidemiol Biomarkers Prev* 2004;**13**:1316-24.  
12  
13 27 Stang A, Jockel KH, Baumgardt-Elms C, et al. Firefighting and risk of testicular cancer:  
14 results from a German population-based case-control study. *Am J Ind Med* 2003;**43**:291-  
15 4.  
16  
17 28 Baumgardt-Elms C, Ahrens W, Broman K, et al. Testicular cancer and electromagnetic  
18 fields (EMF) in the workplace: results of a population-based case-control study in  
19 Germany. *Cancer Causes Control* 2002;**13**:895-902.  
20  
21 29 International Labour Office. International Standard Classification of Occupations.  
22 ISCO68. Geneva: International Labour Office 1968  
23  
24 30 European Commission. National industrial classification of all economic activities  
25 (NACE). Luxembourg: Office for Official Publications of the EC 1993  
26  
27 31 Galobardes B, Shaw M, Lawlor DA, et al. Indicators of socioeconomic position (part 1).  
28 *J Epidemiol Community Health* 2006;**60**:7-12.  
29  
30 32 Galobardes B, Shaw M, Lawlor DA, et al. Indicators of socioeconomic position (part 2).  
31 *J Epidemiol Community Health* 2006;**60**:95-101.  
32  
33 33 Hardell L, Nasman A, Ohlson CG, et al. Case-control study on risk factors for testicular  
34 cancer. *Int J Oncol* 1998;**13**:1299-303.  
35  
36 34 Mills PK, Newell GR, Johnson DE. Testicular cancer associated with employment in  
37 agriculture and oil and natural gas extraction. *Lancet* 1984;**1**(8370):207-10.  
38  
39 35 Wiklund K, Dich J., Holm LE, et al. Risk of cancer in pesticide applicators in Swedish  
40 agriculture. *Br J Ind Med* 1989;**46**:809-814.  
41  
42  
43  
44  
45  
46  
47  
48  
49  
50  
51  
52  
53  
54  
55  
56  
57  
58  
59  
60

1  
2  
3 36 Kristensen P, Andersen A, Irgens LM, et al. Cancer in offspring of parents engaged in  
4 agricultural activities in Norway: incidence and risk factors in the farm environment. *Int J*  
5 *Cancer* 1996;**65**:39-50.  
6  
7

8  
9 37 Moller H. Work in agriculture, childhood residence, nitrate exposure, and testicular  
10 cancer risk: a case-control study in Denmark. *Cancer Epidemiol Biomarkers Prev*  
11 1997;**6**:141-144.  
12  
13

14  
15 38 Lynge E and Thygesen L. Occupational cancer in Denmark. Cancer incidence in the  
16 1970 census population. *Scand J Work Environ Health* 1990;**16**(Suppl 2):3-35.  
17  
18

19 39 Martikainen P and Valkonen T. Bias related to the exclusion of the economically  
20 inactive in studies on social class differences in mortality. *Int J Epidemiol* 1999; **28**:899-  
21 904.  
22  
23  
24  
25  
26  
27  
28  
29  
30  
31  
32  
33  
34  
35  
36  
37  
38  
39  
40  
41  
42  
43  
44  
45  
46  
47  
48  
49  
50  
51  
52  
53  
54  
55  
56  
57  
58  
59  
60

STROBE 2007 (v4) Statement—Checklist of items that should be included in reports of *case-control studies*

| Section/Topic                | Item # | Recommendation                                                                                                                                                                       | Reported on page # |
|------------------------------|--------|--------------------------------------------------------------------------------------------------------------------------------------------------------------------------------------|--------------------|
| Title and abstract           | 1      | (a) Indicate the study's design with a commonly used term in the <u>title</u> or the abstract                                                                                        | 1                  |
|                              |        | (b) Provide in the abstract an informative and balanced summary of what was done and what was found                                                                                  | 4                  |
| <b>Introduction</b>          |        |                                                                                                                                                                                      |                    |
| Background/rationale         | 2      | Explain the scientific background and rationale for the investigation being reported                                                                                                 | 5                  |
| Objectives                   | 3      | State specific objectives, including any prespecified hypotheses                                                                                                                     | 4-5                |
| <b>Methods</b>               |        |                                                                                                                                                                                      |                    |
| Study design                 | 4      | Present key elements of study design early in the paper                                                                                                                              | 5                  |
| Setting                      | 5      | Describe the setting, locations, and relevant dates, including periods of recruitment, exposure, follow-up, and data collection                                                      | 4,5,6              |
| Participants                 | 6      | (a) Give the eligibility criteria, and the sources and methods of case ascertainment and control selection. Give the rationale for the choice of cases and controls                  | 5,6                |
|                              |        | (b) For matched studies, give matching criteria and the number of controls per case                                                                                                  | 6                  |
| Variables                    | 7      | Clearly define all outcomes, exposures, predictors, potential confounders, and effect modifiers. Give diagnostic criteria, if applicable                                             | 6,7,8              |
| Data sources/<br>measurement | 8*     | For each variable of interest, give sources of data and details of methods of assessment (measurement). Describe comparability of assessment methods if there is more than one group | 5,6,7              |
| Bias                         | 9      | Describe any efforts to address potential sources of bias                                                                                                                            | 14,15              |
| Study size                   | 10     | Explain how the study size was arrived at                                                                                                                                            | 4                  |
| Quantitative variables       | 11     | Explain how quantitative variables were handled in the analyses. If applicable, describe which groupings were chosen and why                                                         | 7                  |
| Statistical methods          | 12     | (a) Describe all statistical methods, including those used to control for confounding                                                                                                | 5,6,15             |
|                              |        | (b) Describe any methods used to examine subgroups and interactions                                                                                                                  | 8                  |
|                              |        | (c) Explain how missing data were addressed                                                                                                                                          | 7                  |
|                              |        | (d) If applicable, explain how matching of cases and controls was addressed                                                                                                          | 6                  |
|                              |        | (e) Describe any sensitivity analyses                                                                                                                                                | 14                 |

|                          |     |                                                                                                                                                                                                              |                   |
|--------------------------|-----|--------------------------------------------------------------------------------------------------------------------------------------------------------------------------------------------------------------|-------------------|
| <b>Results</b>           |     |                                                                                                                                                                                                              |                   |
| Participants             | 13* | (a) Report numbers of individuals at each stage of study—eg numbers potentially eligible, examined for eligibility, confirmed eligible, included in the study, completing follow-up, and analysed            | 6                 |
|                          |     | (b) Give reasons for non-participation at each stage                                                                                                                                                         | 6                 |
|                          |     | (c) Consider use of a flow diagram                                                                                                                                                                           | -                 |
| Descriptive data         | 14* | (a) Give characteristics of study participants (eg demographic, clinical, social) and information on exposures and potential confounders                                                                     | 6                 |
|                          |     | (b) Indicate number of participants with missing data for each variable of interest                                                                                                                          | 10                |
| Outcome data             | 15* | Report numbers in each exposure category, or summary measures of exposure                                                                                                                                    | Table 1 – Table 4 |
| Main results             | 16  | (a) Give unadjusted estimates and, if applicable, confounder-adjusted estimates and their precision (eg, 95% confidence interval). Make clear which confounders were adjusted for and why they were included | 8                 |
|                          |     | (b) Report category boundaries when continuous variables were categorized                                                                                                                                    | 7                 |
|                          |     | (c) If relevant, consider translating estimates of relative risk into absolute risk for a meaningful time period                                                                                             | -                 |
| Other analyses           | 17  | Report other analyses done—eg analyses of subgroups and interactions, and sensitivity analyses                                                                                                               | Table 1 – Table 4 |
| <b>Discussion</b>        |     |                                                                                                                                                                                                              |                   |
| Key results              | 18  | Summarise key results with reference to study objectives                                                                                                                                                     | 14,15             |
| Limitations              | 19  | Discuss limitations of the study, taking into account sources of potential bias or imprecision. Discuss both direction and magnitude of any potential bias                                                   | 14,15             |
| Interpretation           | 20  | Give a cautious overall interpretation of results considering objectives, limitations, multiplicity of analyses, results from similar studies, and other relevant evidence                                   | 14                |
| Generalisability         | 21  | Discuss the generalisability (external validity) of the study results                                                                                                                                        | 14                |
| <b>Other information</b> |     |                                                                                                                                                                                                              |                   |
| Funding                  | 22  | Give the source of funding and the role of the funders for the present study and, if applicable, for the original study on which the present article is based                                                | 16                |

\*Give information separately for cases and controls in case-control studies and, if applicable, for exposed and unexposed groups in cohort and cross-sectional studies.

**Note:** An Explanation and Elaboration article discusses each checklist item and gives methodological background and published examples of transparent reporting. The STROBE checklist is best used in conjunction with this article (freely available on the Web sites of PLoS Medicine at <http://www.plosmedicine.org/>, Annals of Internal Medicine at <http://www.annals.org/>, and Epidemiology at <http://www.epidem.com/>). Information on the STROBE Initiative is available at [www.strobe-statement.org](http://www.strobe-statement.org).



## A Population-based Case-Control Study on Social Factors and Risk of Testicular Germ Cell Tumours

|                                 |                                                                                                                                                                                                                                                                                                                                                                                                                                                                                                                                                                                                                                                                                                                                                                                                                                                                                                                                                                       |
|---------------------------------|-----------------------------------------------------------------------------------------------------------------------------------------------------------------------------------------------------------------------------------------------------------------------------------------------------------------------------------------------------------------------------------------------------------------------------------------------------------------------------------------------------------------------------------------------------------------------------------------------------------------------------------------------------------------------------------------------------------------------------------------------------------------------------------------------------------------------------------------------------------------------------------------------------------------------------------------------------------------------|
| Journal:                        | <i>BMJ Open</i>                                                                                                                                                                                                                                                                                                                                                                                                                                                                                                                                                                                                                                                                                                                                                                                                                                                                                                                                                       |
| Manuscript ID:                  | bmjopen-2013-003833                                                                                                                                                                                                                                                                                                                                                                                                                                                                                                                                                                                                                                                                                                                                                                                                                                                                                                                                                   |
| Article Type:                   | Research                                                                                                                                                                                                                                                                                                                                                                                                                                                                                                                                                                                                                                                                                                                                                                                                                                                                                                                                                              |
| Date Submitted by the Author:   | 16-Aug-2013                                                                                                                                                                                                                                                                                                                                                                                                                                                                                                                                                                                                                                                                                                                                                                                                                                                                                                                                                           |
| Complete List of Authors:       | Schmeisser, Nils; State Statistical Institute Bremen, Conway, David; University of Glasgow, College of Medical, Veterinary and Life Sciences, Stang, Andreas; Martin-Luther-University of Halle-Wittenberg, Medical Faculty, Institute of Medical Epidemiology, Biometry and Informatics, Institute of Clinical Epidemiology<br>Jahn, Ingeborg; Bremen University, Bremen Institute for Prevention Research and Social Medicine, Stegmaier, Christa; Saarland Cancer Registry, Baumgardt-Elms, Cornelia; Authority for Social Affairs, Family, Health and Consumer Protection, Joeckel, Karl-Heinz; University of Duisburg-Essen, Institute for Medical Informatics, Biometry and Epidemiology, Behrens, Thomas; Institute for Prevention and Occupational Medicine of the German Social Accident Insurance (IPA), Ahrens, Wolfgang; Bremen University - Bremen Institute for Prevention Research and Social Medicine, Epidemiological Methods and Etiologic Research |
| <b>Primary Subject Heading</b>: | Occupational and environmental medicine                                                                                                                                                                                                                                                                                                                                                                                                                                                                                                                                                                                                                                                                                                                                                                                                                                                                                                                               |
| Secondary Subject Heading:      | Oncology, Epidemiology, Public health, Reproductive medicine                                                                                                                                                                                                                                                                                                                                                                                                                                                                                                                                                                                                                                                                                                                                                                                                                                                                                                          |
| Keywords:                       | Epidemiology < ONCOLOGY, GENITOURINARY MEDICINE, Adult oncology < ONCOLOGY                                                                                                                                                                                                                                                                                                                                                                                                                                                                                                                                                                                                                                                                                                                                                                                                                                                                                            |
|                                 |                                                                                                                                                                                                                                                                                                                                                                                                                                                                                                                                                                                                                                                                                                                                                                                                                                                                                                                                                                       |

SCHOLARONE™  
Manuscripts

1  
2  
3 **A Population-based Case-Control Study on Social Factors and Risk of Testicular**  
4 **Germ Cell Tumours**  
5  
6

7 **Running head:** Social Factors and Testicular Cancer  
8

9 Authors and affiliation:

10 Nils Schmeisser<sup>1, 2</sup>

11 David I. Conway<sup>3</sup>

12 Andreas Stang<sup>4</sup>

13 Ingeborg Jahn<sup>5</sup>

14 Christa Stegmaier<sup>6</sup>

15 Cornelia Baumgardt-Elms<sup>7</sup>

16 Karl-Heinz Jöckel<sup>8</sup>

17 Thomas Behrens<sup>9</sup>

18 Wolfgang Ahrens<sup>2, 9</sup>

19 1. State Statistical Institute Bremen; Bremen, Germany

20 2. University of Bremen, Bremen, Germany

21 3. University of Glasgow, College of Medical, Veterinary and Life Sciences; Glasgow, UK

22 4. Martin-Luther-University of Halle-Wittenberg, Medical Faculty, Institute of Medical  
23 Epidemiology, Biometry and Informatics, Clinical Epidemiology Unit; Halle, Germany

24 5. Leibniz-Institute for Prevention Research and Epidemiology - BIPS, Department of  
25 Prevention and Evaluation; Bremen, Germany

26 6. Saarland Cancer Registry; Saarbrücken, Germany

27 7. Authority of Science and Health, Authority for Social Affairs, Family, Health and  
28 Consumer Protection; Hamburg, Germany

29 8. University of Duisburg-Essen, Institute for Medical Informatics, Biometry and  
30 Epidemiology; Essen, Germany

31 9. Leibniz-Institute for Prevention Research and Epidemiology - BIPS, Department of  
32 Epidemiological Methods and Etiologic Research; Bremen, Germany

33  
34  
35  
36  
37  
38  
39  
40  
41  
42  
43  
44  
45  
46  
47 Address for correspondence:

48 Prof. Dr. Wolfgang Ahrens

49 Leibniz-Institute for Prevention Research and Epidemiology - BIPS

50 Achterstrasse 30

51 28359 Bremen, Germany

52 Phone: +49 421 218 56822

53 Fax: +49 421 218 56821

54 Email: ahrens@bips.uni-bremen.de  
55  
56  
57  
58  
59  
60



1  
2  
3  
4 **Keywords:** Case control study; education; male germ cell cancer; occupational risk  
5 factors; social position; socioeconomic status  
6  
7

8  
9 **Word count:** 2.642

10 **Abstract:** 254

11 **Summary:** 191  
12  
13

## 14 **Summary**

15 Article focus:

- 16  
17  
18  
19
  - Background: It is controversial whether social position is associated with the risk of  
20 testicular cancer. The aims of this analysis are a) to classify social position based  
21 on job titles reported in an occupational history, and b) to assess the association  
22 between testicular cancer and job-title based social position.  
23  
24

25  
26 Key messages:

- 27  
28
  - Job-title based social position is not associated with testicular cancer.
  - Occupation as farmer or farm worker entails an elevated risk of testicular cancer,  
29 possibly due to related exposures.  
30  
31

32  
33  
34 Strengths and limitations:

- 35  
36
  - Occupational social factors were measured on the basis of a detailed lifetime  
37 history of occupations. This population-based study allows examination of the full  
38 spectrum of social differences in the general population.
  - The basis for the classification of social position is relatively valid because job  
39 histories usually are reported with good accuracy and the information was  
40 obtained by in-person interviews,  
41  
42
  - A limitation is that the differential response of cases (76%) and controls (57%) may  
43 bias the effect estimates if possible selection effects differ between both groups.  
44 Also periods of unemployment and illness cannot be ranked by the scales utilised  
45 in this study.  
46  
47  
48  
49  
50  
51  
52  
53  
54  
55  
56  
57  
58  
59  
60

**Abstract:**

**Objectives:** Incidence rates for testicular cancer have risen over the last few decades. Findings of an association between the risk of testicular cancer and social factors are controversial. The association of testicular cancer and different indicators of social factors were examined in this study.

**Design:** Case-control study.

**Setting:** Population-based multi-centre study in four German regions (city states Bremen and Hamburg, the Saarland region and the city of Essen).

**Participants:** The study included 797 control subjects and 266 subjects newly diagnosed with testicular cancer of which 167 cases were classified as seminoma and 99 as non-seminoma. The age of study subjects ranged from 15 to 69 years.

**Methods:** Social position was classified by educational attainment level, post educational training, occupational sectors according to Erikson-Goldthorpe-Portocarrero (EGP) and the socioeconomic status (SES) on the basis of the International Socio-Economic Index of occupational status (ISEI). Odds ratios [ORs] and corresponding 95% confidence intervals [95%-CIs] were calculated for the whole study sample and for seminoma and non-seminoma separately.

**Results:** Testicular cancer risk was modestly increased among subjects with an apprenticeship (OR=1.7 [95%-CI: 1.0-2.8]) or a university degree (OR=1.6 [95%-CI: 0.9-2.8]) relative to those whose education was limited to school. Analysis of occupational sectors revealed an excess risk for farmers and farm related occupations. No clear trend was observed for the analyses according the ISEI-scale.

**Conclusions:** Social factors based on occupational measures were not a risk factor for testicular cancer in this study. The elevated risk in farmers and farm related occupations warrants further research including analysis of occupational exposures.

## Introduction

Subjects affected most by testicular cancer are men between 15 and 40 years of age. For men older than 40 years of age the risk of testicular cancer decreases continuously.[1, 2] The age distribution of testicular cancer is in sharp contrast to other neoplasms for which incidence rises with increasing age. Established risk factors for testicular cancer include a family history of testicular cancer and a history of an undescended testis.[3, 4] Exposure to endocrine disrupting chemicals in an occupational context or *in utero*, has been suggested as a factor in cancer development.[5] The incidence rates of testicular cancer have risen continuously in Western Europe and other industrialized countries, which may be due to changed environmental and life circumstances in these countries. In particular, in Germany the average numbers of testicular cancer per year in the 1980s and 1990s were 3196 and 3836. The corresponding age-standardised incidence rates were 7.7 and 8.9 per 100.000.[6] However, study results on the association of social factors and testicular cancer have been conflicting. Excess risks for higher levels of education or occupations related to higher social class, like administrators and managers and other professionals were observed in some studies.[7-10] Other studies did not observe an association between social status and testicular cancer [11-17] or even observed an inverse association.[18, 19] In one study the association of testicular cancer and socioeconomic status (SES) differed by histological type.[20] A register based study in Finland observed a decrease of testicular cancer incidence rates among subjects of higher social classes and an increase of incidence rates in the lower social classes between 1971 and 1995, leading to a levelling off of the social gradient.[21]

In this study, in addition to educational attainment at school and level of professional training as defined in a previous study[22] further social factors based on job histories were considered. In detail, socioeconomic status (SES) based on the International Socio-Economic Index (ISEI)[23] and social class based on the Erikson-Goldthorpe-Portocarrero (EGP)[24] classification was explored. Both the International Socio-Economic Index (ISEI) of occupation, which is a vertical grouping approach, and the Erikson-Goldthorpe-Portocarrero (EGP) classification of occupations which adopts a class schema, claim that employment relations are basic social characteristics of western society.

## Study subjects and Methods

All participants were registered residents of the city states Bremen and Hamburg, the Saarland region and the city of Essen. Study subjects randomly drawn from registration offices had to live in the study regions between July 1995 and December 1997. Incident cases, diagnosed between July 1995 and December 1997, were reported by an active registration system via hospitals and pathologists. In Hamburg cases were also identified

1  
2  
3 via the state cancer registry. Eligible cases had to have a new diagnosis of tumour of the  
4 testis (ICD-10: C62.0-C62.9; ICD-O: M9060-M9102).

5  
6 A total of 353 eligible cases and 2014 potential controls were contacted for this study.  
7 Among cases, 54 persons were not reached, 29 persons refused participation. One case  
8 was excluded due to insufficient German language skills. Participation was denied by 552  
9 control subjects, 32 were excluded due to insufficient language skills, 512 had moved  
10 away, had died or were never reached.

11  
12  
13 Copies of pathology reports and histological material were obtained from hospitals.  
14 Pathology reports were reviewed centrally and compared with histological material when  
15 available by a reference pathologist to determine the histological type of tumour. Tumours  
16 were classified as seminomas (N=167, 62.8%), including seminoma not other specified  
17 (ICD-O, M9061: n = 160), anaplastic seminoma (M9062: n = 4), or non-seminomas  
18 (N=99, 37.2%), including embryonal carcinoma (M9070: n = 26), yolk sac tumor (M9071:  
19 n = 1), malignant teratoma not other specified (M9080: n = 2), teratocarcinoma (M9081: n  
20 = 15), malignant teratoma, intermediate (M9083: n = 5), mixed germ cell tumor (M9085: n  
21 = 49), and choriocarcinoma (M9100: n = 1) according to Parkin and co-workers.[25] More  
22 detailed descriptions and demographic characteristics of the participants were published  
23 elsewhere.[22, 26-28] Cases and controls had to be between 15 and 69 years of age. A  
24 n:m-group-matching for 5-year age strata and study region was chosen. To obtain  
25 sufficient power in this study, a matching ratio of 1:4 was realised for the age group 35-69,  
26 while for the age strata 15-34 a matching ratio of 1:2 was considered to be sufficient since  
27 most cases were expected in this age group. Due to overlap of the age distribution of  
28 seminoma and non-seminoma cases, the majority of controls matched to both seminoma  
29 and non-seminoma cases. Thus, for the analyses by histologic subgroup, 725 controls  
30 were matched by age and region to the seminoma cases while 682 controls were  
31 matched by age and region to the non-seminoma cases. Inclusion criteria were fulfilled by  
32 266 cases and 918 controls. Cases and controls were recruited in parallel. For this  
33 purpose controls were selected prospectively according to the expected case distribution.  
34 This left 121 controls for which no matching case interview was obtained.

35  
36  
37 Participants were interviewed face-to-face (N=984, 92.3%) or by telephone (N=82, 7.7%).  
38 Almost all interviews were performed with an index person (N=978, 91.7%). For deceased  
39 subjects or subjects too ill to answer the questions, a next-of-kin interview was solicited.  
40 The interview entailed questions about familial characteristics, family history of cancer and  
41 other diseases, medical conditions since childhood, chemical and physical exposures and  
42 an occupational biography for every job held 6 months or longer.  
43  
44  
45  
46  
47  
48  
49  
50  
51  
52  
53  
54  
55  
56  
57  
58  
59  
60

1  
2  
3 For each employment period, the job title and industry and a brief summary of the job  
4 tasks were assessed. Each job was assigned a five-digit *International Standard Code of*  
5 *Occupations* (ISCO)[29] and a five-digit industry code (NACE).[30]  
6  
7

### 8 9 **Assessment of social factors**

10 Measures of social factors in this study were level of educational attainment at school,  
11 level of professional training, occupational sector based on EGP and social status based  
12 on ISEI.  
13

14 Job title codes (ISCO) were linked to the *International Socio-Economic Index of*  
15 *Occupational Status* (ISEI).[23] The ISEI assigns values between 10 and 90 to job titles  
16 with respect to education and income. Judges, lawyers and physicians achieve the  
17 highest values, while unskilled labourers in agriculture and housekeepers the lowest  
18 values. In this scale a continuous hierarchical approach the distinctions of work related  
19 tasks and social patterns disappear in favour of a single parameter. The ISEI score ranks  
20 occupations by both, level of education and income.[23] ISEI-Scores were defined for the  
21 maximum score ever achieved and the longest held and the last job, respectively.. ISEI  
22 scores were grouped into five categories employing the best possible equal distribution of  
23 controls.  
24  
25

26 For the present analyses, ISCO codes were classified by occupational sector according to  
27 Erikson-Goldthorpe-Portocarrero (EGP). The EGP typology is based on occupational  
28 group, required training, self support/independence, social mobility and leadership. Within  
29 a category it assumes social homogeneity in terms of the market situation (sources and  
30 levels of income, degree of economic security and chances of economic advancement)  
31 and in terms of the work situation (autonomy in performing work-tasks and roles) (24).  
32 Each reported job was classified into one of the following ten occupational categories: (I)  
33 higher service (includes mostly professionals, large enterprise employers and higher  
34 managers (>10 subordinates)); (II) lower service (includes mostly associate professionals,  
35 lower managers (1-10 subordinates), higher sales); (III) routine clericals/sales (includes  
36 non-manual administration and sales workers); (IV) small employers (includes small  
37 entrepreneurs (1-10 subordinates); (V) self-employed (own account workers, no  
38 employees, artists); (VI) manual foremen (manual workers with supervisory status (>1  
39 subordinate)); (VII) skilled manual (mostly craft workers, some skilled service, skilled  
40 machine operators, also gardeners); (VIII) semi-unskilled manual (mostly machine  
41 operators, elementary sales services and state work creation scheme); (IX) farm workers  
42 (employed farm workers, irrespective of skill level; also family farm workers); (X)  
43 farmers/farm managers (self-employed and supervisory farm workers, irrespective of skill  
44  
45  
46  
47  
48  
49  
50  
51  
52  
53  
54  
55  
56  
57  
58  
59  
60

1  
2  
3 level). Categories were collapsed into five groups (I and II; III to V; VI and VII; VII; IX and  
4 X) for analysis.

5  
6 Occupational histories excluded jobs starting within one year before diagnosis in cases or  
7 before the first mailing to controls. The highest category served as the reference for the  
8 analysis of first job, last job, longest held job, job ranked highest and job ranked lowest.  
9 Subjects who had never worked were excluded, except for the ever/never analysis of  
10 EGP. All subjects who did not belong to the group under consideration were used as the  
11 reference group in the ever/never analysis.

12  
13 Educational level was classified by years of schooling into four levels according to the  
14 German school system ( $\leq 9$  years [no school degree, Sonderschulabschluss,  
15 Hauptschulabschluss], 10 years [mittlere Reife], 12 years [Fachabitur] and 13 years  
16 [Abitur]). In addition, the highest professional level attained after school (none,  
17 apprenticeship, university or college degree, others) was analysed.

### 23 24 **Statistical analysis**

25  
26 Odds Ratios (OR) and 95%-confidence intervals [95%-CI] were calculated stratified for the  
27 five year age strata and study centres. All analyses were carried out for the whole study  
28 group and stratified by histological subgroups. Controls were excluded from the subgroup  
29 analyses if no matching case was available in an age-group $\times$ study region stratum. Odds  
30 ratios and corresponding confidence intervals were estimated by conditional logistic  
31 regression using the procedure PHREG. The level of statistical significance was defined  
32 as  $p < 0.05$  (two-sided). The study was designed as an exploratory study as the risk factors  
33 of testicular cancer are largely unknown. The study was powered to detect an OR of 1.8  
34 for any risk factor with a prevalence of 20%, and an OR of 2.0 for any risk factor with a  
35 prevalence of 10%. The study was not powered to confirm any risk for seminoma and  
36 non-seminoma cases separately. All analyses were carried out using SAS 8.2. ORs were  
37 not reported if a given category included less than three cases.

### 44 45 **Results**

46  
47 The proportion of medically confirmed cryptorchidism was higher in cases (9.9%) than in  
48 controls (3.6%). Overall, non-seminoma cases were on average 5 years younger than  
49 seminoma cases and controls (non-seminoma: 30.0 [21-41]; seminoma: 35 [28-49];  
50 controls: 35 [26-58] (median [10<sup>th</sup> percentile – 90<sup>th</sup> percentile])).

51  
52 The distribution of number of occupations for cases and controls is shown in Table 1.  
53 Seven cases (six non-seminoma cases; one seminoma case) and 20 controls were still  
54 attending school or were students with no job history at the time of diagnosis (case) or first  
55 mailing (controls). Job histories of non-seminoma cases lasted 13 [4-25] years, of  
56  
57  
58  
59  
60

seminoma cases 19 [8-32] and of controls 18 [6-41] years (median [10<sup>th</sup> percentile – 90<sup>th</sup> percentile]). Except for the non-seminoma cases the number of occupational periods did not differ substantially between cases and controls.

**Table 1:** Frequency of economically active periods for cases and controls for whole study sample and for seminoma and non-seminoma.

| Study group/ number of job periods | Number of cases | Percent | Number of conrols | Percent |
|------------------------------------|-----------------|---------|-------------------|---------|
| Complete study sample              | 266             | 100.0   | 797               | 100.0   |
| 0                                  | 7               | 2.6     | 20                | 2.5     |
| 1-2                                | 79              | 29.7    | 213               | 26.7    |
| 3-4                                | 112             | 42.1    | 321               | 40.3    |
| 5+                                 | 68              | 25.6    | 243               | 30.5    |
| Seminoma                           | 167             | 100.0   | 725               | 100.0   |
| 0                                  | 1               | 0.6     | 13                | 1.8     |
| 1-2                                | 42              | 25.2    | 192               | 26.5    |
| 3-4                                | 72              | 43.1    | 299               | 41.2    |
| 5+                                 | 52              | 31.1    | 221               | 30.5    |
| Non-seminoma                       | 99              | 100.0   | 682               | 100.0   |
| 0                                  | 6               | 6.1     | 20                | 2.9     |
| 1-2                                | 37              | 37.4    | 193               | 28.3    |
| 3-4                                | 40              | 40.4    | 274               | 40.2    |
| 5+                                 | 16              | 16.2    | 195               | 28.6    |

The distribution of cases and controls by educational level and professional degree is shown in Table 2. Subjects with professional degrees (i.e. apprenticeship, technical colleges, study at university and university for applied sciences) were at higher risk as compared to subjects without professional training in the whole study group and in the the seminoma subgroup but not in the non-seminoma subgroup. No risk was observed for being employed before the age of 18 (OR=1.0; 95%-CI 0.7-1.3) (data not shown).

**Table 2:** Distribution of cases and controls by educational level and professional degrees and corresponding odds ratios with 95% confidence intervals

|                              | Cases |       | Controls |       | OR (95%-CI)      |
|------------------------------|-------|-------|----------|-------|------------------|
|                              | N     | %     | N        | %     |                  |
| <b>Complete study sample</b> | 269   | 100.0 | 797      | 100.0 |                  |
| Years at school              |       |       |          |       |                  |
| ≤9                           | 89    | 33.1  | 304      | 38.1  | 1.0 <sup>†</sup> |
| 10                           | 61    | 22.7  | 192      | 24.1  | 0.9 (0.6-1.3)    |
| 12                           | 25    | 9.3   | 78       | 9.8   | 0.9 (0.5-1.5)    |
| 13                           | 9     | 34.9  | 222      | 27.9  | 1.1 (0.8-1.6)    |
| Unknown                      | 0     | 0.0   | 1        | 0.1   | -                |
| Professional training        |       |       |          |       |                  |
| None                         | 22    | 8.3   | 95       | 11.9  | 1.0 <sup>†</sup> |
| Apprenticeship               | 163   | 61.3  | 485      | 60.9  | 1.7 (1.0-2.8)    |
| University degree            | 62    | 23.3  | 154      | 19.3  | 1.6 (0.9-2.8)    |
| Other                        | 19    | 7.1   | 63       | 7.9   | 1.0 (0.4-2.3)    |
| <b>Seminoma</b>              | 170   | 100.0 | 725      | 100.0 |                  |
| Years at school              |       |       |          |       |                  |
| ≤9                           | 57    | 35.3  | 267      | 36.8  | 1.0 <sup>†</sup> |
| 10                           | 39    | 22.9  | 180      | 24.8  | 0.9 (0.6-1.4)    |
| 12                           | 17    | 10.0  | 75       | 10.3  | 0.9 (0.5-1.7)    |

|                       |       |      |       |      |                  |
|-----------------------|-------|------|-------|------|------------------|
| 13                    | 54    | 31.8 | 202   | 27.9 | 1.0 (0.7-1.7)    |
| Unknown               | 0     | 0.0  | 1     | 0.1  | -                |
| Professional training |       |      |       |      |                  |
| None                  | 10    | 7.1  | 88    | 12.1 | 1.0 <sup>†</sup> |
| Apprenticeship        | 110   | 65.3 | 446   | 61.5 | 2.5 (1.3-5.1)    |
| University degree     | 40    | 23.5 | 142   | 19.6 | 2.1 (1.0-4.6)    |
| Other                 | 7     | 4.1  | 49    | 6.8  | 2.3 (0.7-7.2)    |
| <b>Non-seminoma</b>   |       |      |       |      |                  |
| 99                    | 100.0 | 682  | 100.0 |      |                  |
| Years at school       |       |      |       |      |                  |
| ≤9                    | 29    | 29.3 | 225   | 33.2 | 1.0 <sup>†</sup> |
| 10                    | 22    | 22.2 | 172   | 25.4 | 0.8 (0.4-1.5)    |
| 12                    | 8     | 8.1  | 73    | 10.8 | 0.8 (0.3-1.9)    |
| 13                    | 40    | 40.4 | 206   | 30.4 | 1.1 (0.6-1.9)    |
| Unknown               | 0     | 0.0  | 1     | 0.1  | -                |
| Professional training |       |      |       |      |                  |
| None                  | 12    | 12.1 | 80    | 11.7 | 1.0 <sup>†</sup> |
| Apprenticeship        | 53    | 53.5 | 400   | 58.7 | 0.9 (0.5-1.9)    |
| University degree     | 22    | 22.2 | 140   | 20.5 | 1.1 (0.5-2.5)    |
| Other                 | 12    | 12.1 | 62    | 9.1  | 0.5 (0.2-1.4)    |

<sup>†</sup>Reference.

No difference in average ISEI-score was observed between cases and controls (cases: mean score 42.5, median score 39; controls: mean score 42.4, median score 39). Risk estimates by ISEI-scores are presented in Table 3. Analyses of the maximum ISEI score reached during lifetime showed no increased risks, neither for the complete study sample, nor for the seminoma and non-seminoma study samples. Similarly, the analyses by ISEI of the job held longest and the last job held revealed no associations with testicular cancer.

**Table 3:** Distribution of achieved maximum ISEI score and of ISEI scores for the longest and last held job for whole study population and for histologic subgroups with corresponding odds ratios.

| ISEI score                   | Cases |      | Controls |      | OR (95%-CI)    |
|------------------------------|-------|------|----------|------|----------------|
|                              | N     | %    | N        | %    |                |
| <b>Complete study sample</b> |       |      |          |      |                |
| <b>Maximum ISEI score</b>    |       |      |          |      |                |
| [16-37)                      | 5     | 22.0 | 156      | 19.6 | 1.1 [0.7-1.7]  |
| [37-44)                      | 47    | 18.1 | 172      | 21.6 | 0.8 [0.5-1.3]  |
| [44-55)                      | 51    | 19.7 | 151      | 19.0 | 1.0 [0.6-1.5]  |
| [55-66)                      | 51    | 19.7 | 151      | 19.0 | 0.9 [0.6-1.5]  |
| [66-88]                      | 53    | 20.5 | 147      | 18.4 | 1 <sup>†</sup> |
| Missing                      | 7     |      | 20       |      |                |
| <b>Last held job</b>         |       |      |          |      |                |
| [16-37)                      | 95    | 36.7 | 266      | 34.2 | 0.9 [0.6-1.4]  |
| [37-44)                      | 35    | 13.5 | 131      | 16.8 | 0.8 [0.5-1.3]  |
| [44-55)                      | 38    | 14.7 | 145      | 18.6 | 0.7 [0.4-1.1]  |
| [55-66)                      | 44    | 17.0 | 117      | 15.0 | 0.9 [0.5-1.5]  |
| [66-88]                      | 47    | 18.1 | 119      | 15.3 | 1 <sup>†</sup> |
| Missing                      | 7     |      | 20       |      |                |
| <b>Longest held job</b>      |       |      |          |      |                |



|                           |     |      |     |      |                |
|---------------------------|-----|------|-----|------|----------------|
| [16-37]                   | 102 | 39.4 | 277 | 34.9 | 0.9 [0.6-1.4]  |
| [37-44]                   | 40  | 15.4 | 150 | 18.8 | 0.8 [0.4-1.3]  |
| [44-55]                   | 33  | 12.7 | 144 | 18.1 | 0.6 [0.3-1.0]  |
| [55-66]                   | 43  | 16.6 | 106 | 13.3 | 1.0 [0.6-1.6]  |
| [66-88]                   | 41  | 15.8 | 100 | 12.6 | 1 <sup>†</sup> |
| Missing                   | 7   |      | 20  | 2.4  |                |
| <b>SEMINOMA</b>           |     |      |     |      |                |
| <b>Maximum ISEI score</b> |     |      |     |      |                |
| [16-37]                   | 34  | 20.5 | 141 | 19.9 | 1.2 [0.7-2.2]  |
| [37-44]                   | 32  | 19.3 | 159 | 22.3 | 0.9 [0.5-1.5]  |
| [44-55]                   | 32  | 19.3 | 137 | 19.2 | 0.9 [0.5-1.6]  |
| [55-66]                   | 32  | 19.3 | 141 | 19.8 | 0.9 [0.5-1.6]  |
| [66-88]                   | 36  | 21.7 | 134 | 18.8 | 1 <sup>†</sup> |
| Missing                   | 1   |      | 13  |      |                |
| <b>Last held job</b>      |     |      |     |      |                |
| [16-37]                   | 56  | 33.7 | 241 | 33.8 | 0.9 [0.5-1.5]  |
| [37-44]                   | 24  | 14.5 | 123 | 17.3 | 0.8 [0.5-1.5]  |
| [44-55]                   | 25  | 15.1 | 133 | 18.7 | 0.7 [0.4-1.3]  |
| [55-66]                   | 29  | 17.5 | 109 | 15.3 | 0.9 [0.5-1.6]  |
| [66-88]                   | 32  | 19.3 | 107 | 15.0 | 1 <sup>†</sup> |
| <b>Longest held job</b>   |     |      |     |      |                |
| [16-37]                   | 61  | 36.7 | 259 | 35.9 | 0.8 [0.5-1.4]  |
| [37-44]                   | 29  | 17.5 | 133 | 18.3 | 0.8 [0.5-1.5]  |
| [44-55]                   | 21  | 12.7 | 128 | 17.7 | 0.5 [0.3-1.0]  |
| [55-66]                   | 25  | 15.1 | 101 | 13.9 | 0.8 [0.4-1.5]  |
| [66-88]                   | 30  | 18.1 | 91  | 12.6 | 1 <sup>†</sup> |
| Missing                   | 1   |      | 13  |      |                |
| <b>NON-SEMINOMA</b>       |     |      |     |      |                |
| <b>Maximum ISEI score</b> |     |      |     |      |                |
| [16-37]                   | 22  | 23.7 | 128 | 19.5 | 0.9 [0.4-1.9]  |
| [37-44]                   | 16  | 17.2 | 148 | 22.3 | 0.7 [0.3-1.5]  |
| [44-55]                   | 19  | 20.4 | 129 | 19.5 | 0.9 [0.5-1.9]  |
| [55-66]                   | 19  | 20.4 | 133 | 20.1 | 1.0 [0.5-1.9]  |
| [66-88]                   | 17  | 18.3 | 124 | 18.7 | 1 <sup>†</sup> |
| Missing                   | 6   |      |     |      |                |
| <b>Last held job</b>      |     |      |     |      |                |
| [16-37]                   | 37  | 39.8 | 223 | 33.8 | 0.9 [0.4-1.7]  |
| [37-44]                   | 12  | 14.0 | 110 | 16.6 | 0.7 [0.3-1.6]  |
| [44-55]                   | 14  | 14.0 | 126 | 19.0 | 0.7 [0.3-1.5]  |
| [55-66]                   | 15  | 16.1 | 103 | 15.5 | 0.9 [0.4-2.0]  |
| [66-88]                   | 15  | 16.1 | 100 | 15.1 | 1 <sup>†</sup> |
| <b>Longest held job</b>   |     |      |     |      |                |
| [16-37]                   | 40  | 40.4 | 230 | 33.9 | 1.1 [0.5-2.2]  |
| [37-44]                   | 12  | 12.1 | 130 | 19.1 | 0.7 [0.3-1.7]  |
| [44-55]                   | 12  | 12.1 | 128 | 18.8 | 0.6 [0.3-1.5]  |
| [55-66]                   | 18  | 18.2 | 91  | 13.3 | 1.4 [0.6-3.3]  |
| [66-88]                   | 11  | 11.1 | 83  | 12.2 | 1 <sup>†</sup> |
| Missing                   | 6   | 6.1  | 19  | 2.8  |                |

<sup>†</sup>Reference.

ORs by EGP categories are shown in Table 4. An increased risk for testicular cancer was observed for ever holding an agriculture related job (OR=1.9 95%-CI 1.0-3.8). For seminoma cases the effect was of the same strength (OR=2.1 95%-CI 1.0-4.5), while for non-seminoma cases the OR estimate was smaller and statistically non-significant (OR=1.6 95%-CI 0.5-4.8). For all other classes no increased risk was observed. This

1  
2  
3  
4  
5  
6  
7  
8  
9  
10  
11  
12  
13  
14  
15  
16  
17  
18  
19  
20  
21  
22  
23  
24  
25  
26  
27  
28  
29  
30  
31  
32  
33  
34  
35  
36  
37  
38  
39  
40  
41  
42  
43  
44  
45  
46  
47  
48  
49  
50  
51  
52  
53  
54  
55  
56  
57  
58  
59  
60

pattern is seen for almost all analyses presented in Table 4. Compared with subjects in the highest EGP category, increased risks were observed for category IX-X for the first, the last and the occupation with the highest EGP category ever.

For peer review only

**Table 4:** Distribution of study subjects and corresponding odds ratios with 95%-CI by occupational sectors according to Erikson, Goldthorpe and Protocarero for complete study group and histologic subgroups

| Category <sup>1</sup> | Complete study sample |      |          |      |                | Seminoma |      |          |      |                | Non-seminoma <sup>#</sup> |      |          |      |               |
|-----------------------|-----------------------|------|----------|------|----------------|----------|------|----------|------|----------------|---------------------------|------|----------|------|---------------|
|                       | Cases                 |      | Controls |      | OR [95%-CI]    | Cases    |      | Controls |      | OR [95%-CI]    | Cases                     |      | Controls |      | OR [95%-CI]   |
|                       | N                     | %    | N        | %    |                | N        | %    | N        | %    |                | N                         | %    | N        | %    |               |
| First held job        |                       |      |          |      |                |          |      |          |      |                |                           |      |          |      |               |
| I-II                  | 25                    | 9.5  | 69       | 8.9  | 1              | 15       | 8.9  | 63       | 8.8  | 1              | 10                        | 10.8 | 60       | 9.1  | 1             |
| III-V                 | 40                    | 15.3 | 140      | 18.0 | 0.9 [0.5-1.5]  | 24       | 14.2 | 126      | 17.7 | 0.9 [0.4-1.8]  | 16                        | 17.2 | 126      | 19.1 | 0.8 [0.3-1.9] |
| VI-VII                | 132                   | 49.6 | 404      | 52.0 | 1.1 [0.8-1.5]  | 88       | 52.7 | 372      | 52.2 | 1.2 [0.8-1.7]  | 44                        | 47.3 | 335      | 50.8 | 0.9 [0.4-1.9] |
| VIII                  | 55                    | 21.4 | 148      | 19.0 | 1.1 [0.8-1.4]  | 33       | 20.1 | 138      | 19.4 | 1.1 [0.8-1.6]  | 22                        | 23.7 | 128      | 19.4 | 1.0 [0.6-1.5] |
| IX-X                  | 7                     | 2.7  | 16       | 2.1  | 1.6 [0.5-4.6]  | 6        | 3.6  | 13       | 1.8  | 2.1 [0.6-6.7]  | 1                         | 1.1  | 11       | 1.7  | -             |
| Last held job         |                       |      |          |      |                |          |      |          |      |                |                           |      |          |      |               |
| I-II                  | 70                    | 26.7 | 172      | 22.1 | 1              | 45       | 26.6 | 155      | 21.8 | 1              | 25                        | 26.9 | 150      | 22.7 | 1             |
| III-V                 | 533                   | 20.2 | 192      | 24.7 | 0.7 [0.4-1.0]  | 34       | 20.1 | 180      | 25.3 | 0.7 [0.4-1.2]  | 19                        | 20.4 | 162      | 24.5 | 0.6 [0.3-1.1] |
| VI-VII                | 81                    | 30.5 | 243      | 31.3 | 0.9 [0.6-1.3]  | 54       | 32.3 | 223      | 31.3 | 1.0 [0.6-1.6]  | 27                        | 29.0 | 205      | 31.1 | 0.7 [0.4-1.3] |
| VIII                  | 50                    | 19.8 | 165      | 21.2 | 0.9 [0.7-1.1]  | 29       | 18.3 | 151      | 21.2 | 0.9 [0.7-1.2]  | 21                        | 22.6 | 138      | 20.9 | 0.9 [0.6-1.2] |
| IX-X                  | 5                     | 1.9  | 5        | 0.6  | 3.0 [0.8-11.7] | 4        | 2.4  | 3        | 0.4  | 4.3 [0.9-20.8] | 1                         | 1.1  | 5        | 0.8  | -             |
| Longest held job      |                       |      |          |      |                |          |      |          |      |                |                           |      |          |      |               |
| I-II                  | 54                    | 20.6 | 145      | 18.7 | 1              | 37       | 21.9 | 133      | 18.7 | 1              | 17                        | 18.3 | 125      | 18.9 | 1             |
| III-V                 | 46                    | 17.6 | 166      | 21.4 | 0.8 [0.5-1.2]  | 27       | 16.0 | 154      | 21.6 | 0.7 [0.4-1.2]  | 19                        | 20.4 | 139      | 21.1 | 0.8 [0.4-1.6] |
| VI-VII                | 100                   | 38.6 | 287      | 36.9 | 1.1 [0.8-1.6]  | 69       | 41.3 | 261      | 36.7 | 1.2 [0.8-2.0]  | 31                        | 33.3 | 242      | 36.7 | 0.8 [0.4-1.5] |
| VIII                  | 54                    | 23.9 | 171      | 22.0 | 0.9 [0.6-1.3]  | 30       | 18.0 | 156      | 21.9 | 0.0 [0.5-1.2]  | 24                        | 25.8 | 146      | 22.1 | 1.0 [0.7-1.4] |
| IX-X                  | 5                     | 1.9  | 8        | 1.0  | 1.3 [0.4-4.1]  | 3        | 1.8  | 8        | 1.1  | 1.0 [0.2-4.1]  | 2                         | 2.2  | 8        | 1.2  | -             |
| Ever held job         |                       |      |          |      |                |          |      |          |      |                |                           |      |          |      |               |
| I-II                  | 86                    | 32.0 | 231      | 29.0 | 1.1 [0.8-1.5]  | 58       | 34.1 | 211      | 29.1 | 1.1 [0.7-1.5]  | 28                        | 28.3 | 201      | 29.5 | 1.2 [0.7-1.9] |
| III-V                 | 92                    | 34.2 | 308      | 38.6 | 0.7 [0.5-1.0]  | 58       | 34.1 | 286      | 39.4 | 0.6 [0.4-0.9]  | 34                        | 34.3 | 268      | 39.3 | 0.9 [0.5-1.4] |
| VI-VII                | 164                   | 61.7 | 494      | 62.0 | 1.2 [0.9-1.6]  | 108      | 64.7 | 453      | 62.5 | 1.2 [0.8-1.7]  | 56                        | 56.6 | 413      | 60.6 | 1.1 [0.7-1.7] |
| VIII                  | 128                   | 48.1 | 392      | 49.2 | 1.0 [0.7-1.3]  | 84       | 50.3 | 362      | 49.9 | 1.0 [0.7-1.4]  | 44                        | 44.4 | 333      | 48.8 | 1.0 [0.6-1.5] |
| IX-X                  | 16                    | 6.0  | 30       | 3.8  | 1.9 [1.0-3.8]  | 12       | 7.2  | 23       | 3.2  | 2.1 [1.0-4.5]  | 4                         | 4.0  | 22       | 3.2  | 1.6 [0.5-4.8] |

<sup>1</sup>Categories were assigned as follows: I=Higher service (includes mostly professionals, large enterprise employers and higher managers (>10 subordinates)); II=Lower service (includes mostly associate professionals, lower managers (1-10 subordinates), higher sales); III=Routine clerical/sales (includes routine clerical and sales workers); IV=Small employers (includes small entrepreneurs (1-10 subordinates)); V=Independent (own account workers, no employees, artists); VI=Manual foremen (manual workers with supervisory status (>1 subordinate)); VII=Skilled manual (mostly craft workers, some skilled service, skilled machine operators, also gardeners); VIII=Semi-unskilled manual (mostly machine operators, elementary sales services and state work creation scheme); X=Farmers/farm managers (self-employed and supervisory farm workers, irrespective of skill level); XI=Farm and forestry workers (employed farm workers, irrespective of skill level; also family farm workers).

## Discussion

Different methods of assigning social position may produce different results in terms of trends in health and inequality.[31, 32] Four indicators of social position were analysed in this study. School education was not associated with testicular cancer risk. The elevated risk observed for professional training versus no training was restricted to the seminoma subgroup. Overall, our data provide no evidence that the examined social dimensions are associated with testicular cancer. This result is in line with other studies.[11, 17]

Elevated risks for EGP categories other than agriculture were not observed in this study. An excess risk in agriculture and related occupations have been observed in several previous studies.[9, 33-35] It has been suggested that the observed risks in agriculture and related occupations could be associated with specific exposures such as pesticides,[33, 35] fertilizers[36, 37] or contact with farm animals and zoonotic infections[33] which were not in the scope of this analysis. The absence of increased risks for non-agricultural occupational sectors based on the EGP corroborates previous studies.[14, 21, 38]

Social status based on ISEI was no risk factor for testicular cancer in this study. If a social gradient for testicular cancer in Germany existed in the past and exposures were associated with this gradient, this gradient may have been attenuated by an increase in exposures that do not differ by social position or for which the social gradient declined over time. The rising trends of testicular cancer in industrialised countries might be an indirect indication for such an increase of exposures that are (or have become) independent of social position.

This study has some limitations. First, the study suffered from only modest response among controls (cases 76%, controls 57%). In particular in the study region of Hamburg participation was lower among controls with lower education which might have resulted in an overestimation of the risk in the lower social status groups. Hence, it is possible that a participation bias might have biased the effect estimates. However, a sensitivity analysis excluding Hamburg revealed similar findings.

Second, some non-differential misclassification of social status is likely to have occurred. As the assessment of social status is not based on a dichotomous variable, the direction of bias due to non-differential misclassification cannot be predicted. However, our classification is based on occupational titles which are known to be reported with good validity. Moreover, the fact that different indicators of social position give similar results increases confidence in our findings.

Third, periods of unemployment and illness cannot be ranked by both scales utilised in this study. Non-consideration of such periods may lead to an underestimation of any social difference.[39]

1  
2  
3 The strength of this study is to measure occupational social factors on the basis of a  
4 complete history of occupations. This information was obtained by in-person interviews.  
5 The population-based design of this study allows permits full examination of social  
6 differences. Study subjects were not aware of this study hypothesis, and occupational  
7 biography is an unprejudiced variable, so reporting bias is unlikely to occur. Different  
8 possible confounding variables were considered by adjusting for post-educational degree  
9 or medical confirmed undescended testis and job frequency but the results remained  
10 stable in all analyses.  
11  
12  
13  
14  
15

### 16 **Conclusion**

17 The absence of an effect was not specific to the ISEI score, as another occupational  
18 scaling method, the EGP typology, showed no associations with testicular cancer, except  
19 for farming and farm related jobs. Different social indicators may mean different things  
20 with regard to correlates of social position. Our data indicate that a simple social gradient  
21 of testicular cancer risk – if it had existed in the past – may no longer exist. Rather, our  
22 findings support the hypothesis that social inequalities in testicular cancer are not related  
23 occupation-based social position. More information is needed on the specific social  
24 correlates (e.g. work characteristics, living areas). It should be noted that education and  
25 occupation are not only indicators of access to material properties, but are also related to  
26 psychosocial properties.  
27  
28  
29  
30  
31  
32  
33  
34  
35

36 **Contributorship statement:** NS performed the analysis, drafted the manuscript and  
37 interpreted the data. WA designed the study. DC, AS, K-HJ and WA contributed  
38 substantially to the conception of this manuscript and/or the interpretation of the data. All  
39 authors contributed to the revision and finally approved of the version to be published.  
40  
41  
42  
43  
44  
45

46 **Grant support:** Federal Ministry for Education and Research (BMBF no. 01HP 684/8).

47 **Conflict of interest:** None declared.

48 **Data sharing statement:** No additional unpublished data from this study.  
49  
50  
51  
52  
53

### 54 **Reference List**

55  
56 1 Bergström R, Adami HO, Möhner M, et al. Increase in testicular cancer incidence in six  
57 European countries: a birth cohort phenomenon. *J Natl Cancer Inst* 1996;**88**:727-33.  
58  
59  
60

1  
2  
3 2 Liu S, Semenciw R, Waters C, et al. Clues to the aetiological heterogeneity of testicular  
4 seminomas and non-seminomas: time trends and age-period-cohort effects. *Int J*  
5 *Epidemiol* 2000;**29**:826–31.

6  
7  
8  
9 3 Pottern LM, Brown LM, Hoover RN, et al. Testicular cancer risk among young men: role  
10 of cryptorchidism and inguinal hernia. *J Natl Cancer Inst* 1985;**74**:377-81.

11  
12  
13 4 Stang A, Ahrens W, Broman K, et al. Undescended testis and the risk of testicular  
14 cancer: importance of source and classification of exposure information. *Int J Epidemiol*  
15 2001;**30**:1050-6.

16  
17  
18  
19 5 Schottenfeld D. Testicular cancer. In: Schottenfeld D, Fraumeni JF, eds. *Cancer*  
20 *epidemiology and prevention*. New York: Oxford University Press 1996: 1205-19.

21  
22  
23 6 Krebsneuerkrankungen in Deutschland. URL: [www.rki.de](http://www.rki.de) 2010.

24  
25  
26  
27 7 Rimpela AH, Pukkala EI. Cancers of affluence: positive social class gradient and rising  
28 incidence trend in some cancer forms. *Soc Sci Med* 1987;**24**:601-6.

29  
30  
31  
32 8 Prener A, Hsieh CC, Engholm G, et al. Birth order and risk of testicular cancer. *Cancer*  
33 *Causes Control* 1992;**3**:265-72.

34  
35  
36  
37 9 Van den Eeden SK, Weiss NS, Strader CH, et al. Occupation and the occurrence of  
38 testicular cancer. *Am J Ind Med* 1991;**19**:327-37

39  
40  
41  
42 10 Gallagher RP, Huchcroft S, Phillips N, et al. Physical activity, medical history, and risk  
43 of testicular cancer (Alberta and British Columbia, Canada). *Cancer Causes Control*  
44 1995;**6**:398-406.

45  
46  
47  
48 11 Brown LM, Pottern LM, Hoover RN. Testicular cancer in young men: the search for  
49 causes of the epidemic increase in the United States. *J Epidemiol Community Health*  
50 1987;**41**:349-54.

51  
52  
53 12 Davies TW, Palmer CR, Ruja E, Lipscombe JM. Adolescent milk, dairy product and  
54 fruit consumption and testicular cancer. *Br J Cancer* 1996;**74**:657-60.

55  
56  
57  
58 13 Haughey BP, Graham S, Brasure J, et al. The epidemiology of testicular cancer in  
59 upstate New York. *Am J Epidemiol* 1989;**130**:25-36.

- 1  
2  
3 14 Marsa K, Johnsen NF, Bidstrup PE, et al. Social inequality and incidence of and  
4 survival from male genital cancer in a population-based study in Denmark, 1994-2003.  
5  
6 *Eur J Cancer* 2008;**44**:2018-29.  
7  
8  
9 15 Moller H, Skakkebaek NE. Risks of testicular cancer and cryptorchidism in relation to  
10 socio-economic status and related factors: case-control studies in Denmark. *Int J Cancer*  
11 1996;**66**:287-93.  
12  
13  
14 16 Petridou E, Roukas KI, Dessypris N, et al. Baldness and other correlates of sex  
15 hormones in relation to testicular cancer. *Int J Cancer* 1997;**71**:982-5.  
16  
17  
18 17 United Kingdom Testicular Cancer Study Group. Aetiology of testicular cancer:  
19 association with congenital abnormalities, age at puberty, infertility, and exercise. United  
20 Kingdom Testicular Cancer Study Group. *BMJ* 1994;**308**(6941):1393-9.  
21  
22  
23 18 Dusek L, Abrahamova J, Lakomy R, et al. Multivariate analysis of risk factors for  
24 testicular cancer: a hospital-based case-control study in the Czech Republic. *Neoplasma*  
25 2008;**55**:356-68.  
26  
27  
28 19 Walschaerts M, Muller A, Auger J, et al. Environmental, occupational and familial risks  
29 for testicular cancer: a hospital-based case-control study. *Int J Androl* 2007;**30**:222-9.  
30  
31  
32 20 Hayes RB, Brown LM, Pottern LM, et al. Occupation and risk for testicular cancer: a  
33 case-control study. *Int J Epidemiol* 1990;**19**:825-31.  
34  
35  
36 21 Pukkala E, Weiderpass E. Socio-economic differences in incidence rates of cancers of  
37 the male genital organs in Finland, 1971-95. *Int J Cancer* 2002;**102**:643-8.  
38  
39  
40 22 Stang A, Ahrens W, Baumgardt-Elms C, et al. Adolescent milk fat and galactose  
41 consumption and testicular germ cell cancer. *Cancer Epidemiol Biomarkers Prev*  
42 2006;**15**:2189-95.  
43  
44  
45 23 Ganzeboom HBG, Degraaf PM, Treiman DJ, et al. A standard international socio-  
46 economic index of occupational status. *Social Science Research* 1992;**21**:1-56.  
47  
48  
49 24 Erikson R, Goldthorpe JH, Portocarero L. Intergenerational class mobility and the  
50 convergence thesis: England, France and Sweden. *Br J Sociol* 1983;**34**:303-43.  
51  
52  
53  
54  
55  
56  
57  
58  
59  
60

- 1  
2  
3 25 Parkin DM, Shanmugaratnam K, Sobin L, et al. Histological groups for comparative  
4 studies. Report 31. Lyon: International Agency for Research on Cancer 1998  
5  
6  
7 26 Broman K, Stang A, Baumgardt-Elms C, et al. Testicular, other genital, and breast  
8 cancers in first-degree relatives of testicular cancer patients and controls. *Cancer*  
9  
10  
11 *Epidemiol Biomarkers Prev* 2004;**13**:1316-24.  
12  
13 27 Stang A, Jockel KH, Baumgardt-Elms C, et al. Firefighting and risk of testicular cancer:  
14 results from a German population-based case-control study. *Am J Ind Med* 2003;**43**:291-  
15  
16  
17 4.  
18  
19 28 Baumgardt-Elms C, Ahrens W, Broman K, et al. Testicular cancer and electromagnetic  
20 fields (EMF) in the workplace: results of a population-based case-control study in  
21  
22  
23 Germany. *Cancer Causes Control* 2002;**13**:895-902.  
24  
25 29 International Labour Office. International Standard Classification of Occupations.  
26  
27 ISCO68. Geneva: International Labour Office 1968  
28  
29 30 European Commission. National industrial classification of all economic activities  
30  
31 (NACE). Luxembourg: Office for Official Publications of the EC 1993  
32  
33 31 Galobardes B, Shaw M, Lawlor DA, et al. Indicators of socioeconomic position (part 1).  
34  
35  
36 *J Epidemiol Community Health* 2006;**60**:7-12.  
37  
38 32 Galobardes B, Shaw M, Lawlor DA, et al. Indicators of socioeconomic position (part 2).  
39  
40  
41 *J Epidemiol Community Health* 2006;**60**:95-101.  
42  
43 33 Hardell L, Nasman A, Ohlson CG, et al. Case-control study on risk factors for testicular  
44 cancer. *Int J Oncol* 1998;**13**:1299-303.  
45  
46 34 Mills PK, Newell GR, Johnson DE. Testicular cancer associated with employment in  
47  
48 agriculture and oil and natural gas extraction. *Lancet* 1984;**1**(8370):207-10.  
49  
50 35 Wiklund K, Dich J., Holm LE, et al. Risk of cancer in pesticide applicators in Swedish  
51  
52 agriculture. *Br J Ind Med* 1989;**46**:809-814.  
53  
54 36 Kristensen P, Andersen A, Irgens LM, et al. Cancer in offspring of parents engaged in  
55  
56 agricultural activities in Norway: incidence and risk factors in the farm environment. *Int J*  
57  
58 *Cancer* 1996;**65**:39-50.  
59  
60



1  
2  
3 37 Moller H. Work in agriculture, childhood residence, nitrate exposure, and testicular  
4 cancer risk: a case-control study in Denmark. *Cancer Epidemiol Biomarkers Prev*  
5 1997;**6**:141-144.  
6  
7

8  
9 38 Lynge E and Thygesen L. Occupational cancer in Denmark. Cancer incidence in the  
10 1970 census population. *Scand J Work Environ Health* 1990;**16**(Suppl 2):3-35.  
11

12  
13 39 Martikainen P and Valkonen T. Bias related to the exclusion of the economically  
14 inactive in studies on social class differences in mortality. *Int J Epidemiol* 1999; **28**:899-  
15 904.  
16  
17  
18  
19  
20  
21  
22  
23  
24  
25  
26  
27  
28  
29  
30  
31  
32  
33  
34  
35  
36  
37  
38  
39  
40  
41  
42  
43  
44  
45  
46  
47  
48  
49  
50  
51  
52  
53  
54  
55  
56  
57  
58  
59  
60

STROBE 2007 (v4) Statement—Checklist of items that should be included in reports of *case-control studies*

| Section/Topic             | Item # | Recommendation                                                                                                                                                                       | Reported on page # |
|---------------------------|--------|--------------------------------------------------------------------------------------------------------------------------------------------------------------------------------------|--------------------|
| Title and abstract        | 1      | (a) Indicate the study’s design with a commonly used term in the <u>title</u> or the abstract                                                                                        | 1                  |
|                           |        | (b) Provide in the abstract an informative and balanced summary of what was done and what was found                                                                                  | 3                  |
| <b>Introduction</b>       |        |                                                                                                                                                                                      |                    |
| Background/rationale      | 2      | Explain the scientific background and rationale for the investigation being reported                                                                                                 | 2                  |
| Objectives                | 3      | State specific objectives, including any prespecified hypotheses                                                                                                                     | 3                  |
| <b>Methods</b>            |        |                                                                                                                                                                                      |                    |
| Study design              | 4      | Present key elements of study design early in the paper                                                                                                                              | 4, 5               |
| Setting                   | 5      | Describe the setting, locations, and relevant dates, including periods of recruitment, exposure, follow-up, and data collection                                                      | 4                  |
| Participants              | 6      | (a) Give the eligibility criteria, and the sources and methods of case ascertainment and control selection. Give the rationale for the choice of cases and controls                  | 4, 5               |
|                           |        | (b) For matched studies, give matching criteria and the number of controls per case                                                                                                  | 5                  |
| Variables                 | 7      | Clearly define all outcomes, exposures, predictors, potential confounders, and effect modifiers. Give diagnostic criteria, if applicable                                             | 14                 |
| Data sources/ measurement | 8*     | For each variable of interest, give sources of data and details of methods of assessment (measurement). Describe comparability of assessment methods if there is more than one group | 6                  |
| Bias                      | 9      | Describe any efforts to address potential sources of bias                                                                                                                            | 13                 |
| Study size                | 10     | Explain how the study size was arrived at                                                                                                                                            | 3                  |
| Quantitative variables    | 11     | Explain how quantitative variables were handled in the analyses. If applicable, describe which groupings were chosen and why                                                         | 5                  |
| Statistical methods       | 12     | (a) Describe all statistical methods, including those used to control for confounding                                                                                                | 7                  |
|                           |        | (b) Describe any methods used to examine subgroups and interactions                                                                                                                  | 8                  |
|                           |        | (c) Explain how missing data were addressed                                                                                                                                          |                    |
|                           |        | (d) If applicable, explain how matching of cases and controls was addressed                                                                                                          | 5                  |
|                           |        | (e) Describe any sensitivity analyses                                                                                                                                                | 13                 |

| <b>Results</b>           |     |                                                                                                                                                                                                              |                   |
|--------------------------|-----|--------------------------------------------------------------------------------------------------------------------------------------------------------------------------------------------------------------|-------------------|
| Participants             | 13* | (a) Report numbers of individuals at each stage of study—eg numbers potentially eligible, examined for eligibility, confirmed eligible, included in the study, completing follow-up, and analysed            | 7                 |
|                          |     | (b) Give reasons for non-participation at each stage                                                                                                                                                         | 5                 |
|                          |     | (c) Consider use of a flow diagram                                                                                                                                                                           | -                 |
| Descriptive data         | 14* | (a) Give characteristics of study participants (eg demographic, clinical, social) and information on exposures and potential confounders                                                                     | 5                 |
|                          |     | (b) Indicate number of participants with missing data for each variable of interest                                                                                                                          | 9,10              |
| Outcome data             | 15* | Report numbers in each exposure category, or summary measures of exposure                                                                                                                                    | Table 1 – Table 4 |
| Main results             | 16  | (a) Give unadjusted estimates and, if applicable, confounder-adjusted estimates and their precision (eg, 95% confidence interval). Make clear which confounders were adjusted for and why they were included | 14                |
|                          |     | (b) Report category boundaries when continuous variables were categorized                                                                                                                                    | 6                 |
|                          |     | (c) If relevant, consider translating estimates of relative risk into absolute risk for a meaningful time period                                                                                             | -                 |
| Other analyses           | 17  | Report other analyses done—eg analyses of subgroups and interactions, and sensitivity analyses                                                                                                               | Table 1 – Table 4 |
| <b>Discussion</b>        |     |                                                                                                                                                                                                              |                   |
| Key results              | 18  | Summarise key results with reference to study objectives                                                                                                                                                     | 13                |
| Limitations              | 19  | Discuss limitations of the study, taking into account sources of potential bias or imprecision. Discuss both direction and magnitude of any potential bias                                                   | 13                |
| Interpretation           | 20  | Give a cautious overall interpretation of results considering objectives, limitations, multiplicity of analyses, results from similar studies, and other relevant evidence                                   | 13                |
| Generalisability         | 21  | Discuss the generalisability (external validity) of the study results                                                                                                                                        | 13                |
| <b>Other information</b> |     |                                                                                                                                                                                                              |                   |
| Funding                  | 22  | Give the source of funding and the role of the funders for the present study and, if applicable, for the original study on which the present article is based                                                | 14                |

\*Give information separately for cases and controls in case-control studies and, if applicable, for exposed and unexposed groups in cohort and cross-sectional studies.

**Note:** An Explanation and Elaboration article discusses each checklist item and gives methodological background and published examples of transparent reporting. The STROBE checklist is best used in conjunction with this article (freely available on the Web sites of PLoS Medicine at <http://www.plosmedicine.org/>, Annals of Internal Medicine at <http://www.annals.org/>, and Epidemiology at <http://www.epidem.com/>). Information on the STROBE Initiative is available at [www.strobe-statement.org](http://www.strobe-statement.org).
